# Supplementary material
Source: PubMed Central journal article supplement (PMC7567654)
Supplement: 109_2020_1992_MOESM2_ESM.pdf [file 109_2020_1992_MOESM2_ESM.pdf]

**Journal of Molecular Medicine**

**Diagnosing the novel SARS-CoV-2 by quantitative RT-PCR: variations and opportunities**

Horllys G. Barreto<sup>1</sup>, Flávio Augusto de P. Milagres<sup>1</sup>, Gessi Carvalho de Araújo Santos<sup>1</sup>,  
Matheus Martins Daúde<sup>1</sup>, Vagner A. Benedito<sup>2\*</sup>

<sup>1</sup>Molecular Analysis Laboratory, Department of Health Sciences, Faculty of Medicine, Federal University of Tocantins (UFT), Palmas, TO, Brazil; <sup>2</sup>Genetics and Developmental Biology Program, West Virginia University, Morgantown, WV, USA

**\*Corresponding author:**

Email: [vagner.benedito@mail.wvu.edu](mailto:vagner.benedito@mail.wvu.edu)

**Suppl. Fig. 1.** Partial sequence alignment of the new coronavirus (SARS-CoV2) genome deposited at the GenBank. **(A)** Partial alignment of the N gene. **(B)** Partial alignment of the ORF1ab sequence. The colors blue, red and green of the lines correspond to the forward and reverse primers and the probe, respectively as recommended by the CDC/China.

**A**

```

SARS-CoV2 - China/Wuhan-Hu-1 : ATCACGTAGTCGCAACAGTTCCAAGAAATCAACTCCAGGCAGCAGTAGGGGAACTTCTCCTGCTAGAATG : 630
SARS-CoV2 - Japan : ATCACGTAGTCGCAACAGTTCCAAGAAATCAACTCCAGGCAGCAGTAGGGGAACTTCTCCTGCTAGAATG : 630
SARS-CoV2 - South Korea : ATCACGTAGTCGCAACAGTTCCAAGAAATCAACTCCAGGCAGCAGTAGGGGAACTTCTCCTGCTAGAATG : 630
SARS-CoV2 - Nepal : ATCACGTAGTCGCAACAGTTCCAAGAAATCAACTCCAGGCAGCAGTAGGGGAACTTCTCCTGCTAGAATG : 630
SARS-CoV2 - USA : ATCACGTAGTCGCAACAGTTCCAAGAAATCAACTCCAGGCAGCAGTAGGGGAACTTCTCCTGCTAGAATG : 630
SARS-CoV2 - Viet Nam : ATCACGTAGTCGCAACAGTTCCAAGAAATCAACTCCAGGCAGCAGTAGGGGAACTTCTCCTGCTAGAATG : 630
SARS-CoV2 - Australia : ATCACGTAGTCGCAACAGTTCCAAGAAATCAACTCCAGGCAGCAGTAGGGGAACTTCTCCTGCTAGAATG : 630
SARS-CoV2 - Taiwan : ATCACGTAGTCGCAACAGTTCCAAGAAATCAACTCCAGGCAGCAGTAGGGGAACTTCTCCTGCTAGAATG : 630
SARS-CoV2 - Italy : ATCACGTAGTCGCAACAGTTCCAAGAAATCAACTCCAGGCAGCAGTAGGGGAACTTCTCCTGCTAGAATG : 630
SARS-CoV2 - India : ATCACGTAGTCGCAACAGTTCCAAGAAATCAACTCCAGGCAGCAGTAGGGGAACTTCTCCTGCTAGAATG : 630
SARS-CoV2 - Sweden : ATCACGTAGTCGCAACAGTTCCAAGAAATCAACTCCAGGCAGCAGTAGGGGAACTTCTCCTGCTAGAATG : 630
SARS-CoV2 - Spain : ATCACGTAGTCGCAACAGTTCCAAGAAATCAACTCCAGGCAGCAGTAGGGGAACTTCTCCTGCTAGAATG : 630
SARS-CoV2 - Brazil : ATCACGTAGTCGCAACAGTTCCAAGAAATCAACTCCAGGCAGCAGTAGGGGAACTTCTCCTGCTAGAATG : 630
SARS-CoV2 - Pakistan : ATCACGTAGTCGCAACAGTTCCAAGAAATCAACTCCAGGCAGCAGTAGGGGAACTTCTCCTGCTAGAATG : 630

```

```

SARS-CoV2 - China/Wuhan-Hu-1 : GCTGGCAATGGCGGTGATGCTGCTCTTGCTTTGCTGCTGCTTGACAGATTGAACCAAGCTTGAGAGCAAAA : 700
SARS-CoV2 - Japan : GCTGGCAATGGCGGTGATGCTGCTCTTGCTTTGCTGCTGCTTGACAGATTGAACCAAGCTTGAGAGCAAAA : 700
SARS-CoV2 - South Korea : GCTGGCAATGGCGGTGATGCTGCTCTTGCTTTGCTGCTGCTTGACAGATTGAACCAAGCTTGAGAGCAAAA : 700
SARS-CoV2 - Nepal : GCTGGCAATGGCGGTGATGCTGCTCTTGCTTTGCTGCTGCTTGACAGATTGAACCAAGCTTGAGAGCAAAA : 700
SARS-CoV2 - USA : GCTGGCAATGGCGGTGATGCTGCTCTTGCTTTGCTGCTGCTTGACAGATTGAACCAAGCTTGAGAGCAAAA : 700
SARS-CoV2 - Viet Nam : GCTGGCAATGGCGGTGATGCTGCTCTTGCTTTGCTGCTGCTTGACAGATTGAACCAAGCTTGAGAGCAAAA : 700
SARS-CoV2 - Australia : GCTGGCAATGGCGGTGATGCTGCTCTTGCTTTGCTGCTGCTTGACAGATTGAACCAAGCTTGAGAGCAAAA : 700
SARS-CoV2 - Taiwan : GCTGGCAATGGCGGTGATGCTGCTCTTGCTTTGCTGCTGCTTGACAGATTGAACCAAGCTTGAGAGCAAAA : 700
SARS-CoV2 - Italy : GCTGGCAATGGCGGTGATGCTGCTCTTGCTTTGCTGCTGCTTGACAGATTGAACCAAGCTTGAGAGCAAAA : 700
SARS-CoV2 - India : GCTGGCAATGGCGGTGATGCTGCTCTTGCTTTGCTGCTGCTTGACAGATTGAACCAAGCTTGAGAGCAAAA : 700
SARS-CoV2 - Sweden : GCTGGCAATGGCGGTGATGCTGCTCTTGCTTTGCTGCTGCTTGACAGATTGAACCAAGCTTGAGAGCAAAA : 700
SARS-CoV2 - Spain : GCTGGCAATGGCGGTGATGCTGCTCTTGCTTTGCTGCTGCTTGACAGATTGAACCAAGCTTGAGAGCAAAA : 700
SARS-CoV2 - Brazil : GCTGGCAATGGCGGTGATGCTGCTCTTGCTTTGCTGCTGCTTGACAGATTGAACCAAGCTTGAGAGCAAAA : 700
SARS-CoV2 - Pakistan : GCTGGCAATGGCGGTGATGCTGCTCTTGCTTTGCTGCTGCTTGACAGATTGAACCAAGCTTGAGAGCAAAA : 700

```

```

SARS-CoV2 - China/Wuhan-Hu-1 : TGCTGGTAAAGGCCAACAAACAAGGCCAAACTGTCACTAAGAAATCTGCTGCTGAGGCTTCTAAGAA : 770
SARS-CoV2 - Japan : TGCTGGTAAAGGCCAACAAACAAGGCCAAACTGTCACTAAGAAATCTGCTGCTGAGGCTTCTAAGAA : 770
SARS-CoV2 - South Korea : TGCTGGTAAAGGCCAACAAACAAGGCCAAACTGTCACTAAGAAATCTGCTGCTGAGGCTTCTAAGAA : 770
SARS-CoV2 - Nepal : TGCTGGTAAAGGCCAACAAACAAGGCCAAACTGTCACTAAGAAATCTGCTGCTGAGGCTTCTAAGAA : 770
SARS-CoV2 - USA : TGCTGGTAAAGGCCAACAAACAAGGCCAAACTGTCACTAAGAAATCTGCTGCTGAGGCTTCTAAGAA : 770
SARS-CoV2 - Viet Nam : TGCTGGTAAAGGCCAACAAACAAGGCCAAACTGTCACTAAGAAATCTGCTGCTGAGGCTTCTAAGAA : 770
SARS-CoV2 - Australia : TGCTGGTAAAGGCCAACAAACAAGGCCAAACTGTCACTAAGAAATCTGCTGCTGAGGCTTCTAAGAA : 770
SARS-CoV2 - Taiwan : TGCTGGTAAAGGCCAACAAACAAGGCCAAACTGTCACTAAGAAATCTGCTGCTGAGGCTTCTAAGAA : 770
SARS-CoV2 - Italy : TGCTGGTAAAGGCCAACAAACAAGGCCAAACTGTCACTAAGAAATCTGCTGCTGAGGCTTCTAAGAA : 770
SARS-CoV2 - India : TGCTGGTAAAGGCCAACAAACAAGGCCAAACTGTCACTAAGAAATCTGCTGCTGAGGCTTCTAAGAA : 770
SARS-CoV2 - Sweden : TGCTGGTAAAGGCCAACAAACAAGGCCAAACTGTCACTAAGAAATCTGCTGCTGAGGCTTCTAAGAA : 770
SARS-CoV2 - Spain : TGCTGGTAAAGGCCAACAAACAAGGCCAAACTGTCACTAAGAAATCTGCTGCTGAGGCTTCTAAGAA : 770
SARS-CoV2 - Brazil : TGCTGGTAAAGGCCAACAAACAAGGCCAAACTGTCACTAAGAAATCTGCTGCTGAGGCTTCTAAGAA : 770
SARS-CoV2 - Pakistan : TGCTGGTAAAGGCCAACAAACAAGGCCAAACTGTCACTAAGAAATCTGCTGCTGAGGCTTCTAAGAA : 770

```

```

SARS-CoV2 - China/Wuhan-Hu-1 : GCCTCGGCAAAAACGTACTGCCACTAAAGCATACAATGTAACACAAGCTTTCGGCAGACGTGGTCCAGAA : 840
SARS-CoV2 - Japan : GCCTCGGCAAAAACGTACTGCCACTAAAGCATACAATGTAACACAAGCTTTCGGCAGACGTGGTCCAGAA : 840
SARS-CoV2 - South Korea : GCCTCGGCAAAAACGTACTGCCACTAAAGCATACAATGTAACACAAGCTTTCGGCAGACGTGGTCCAGAA : 840
SARS-CoV2 - Nepal : GCCTCGGCAAAAACGTACTGCCACTAAAGCATACAATGTAACACAAGCTTTCGGCAGACGTGGTCCAGAA : 840
SARS-CoV2 - USA : GCCTCGGCAAAAACGTACTGCCACTAAAGCATACAATGTAACACAAGCTTTCGGCAGACGTGGTCCAGAA : 840
SARS-CoV2 - Viet Nam : GCCTCGGCAAAAACGTACTGCCACTAAAGCATACAATGTAACACAAGCTTTCGGCAGACGTGGTCCAGAA : 840
SARS-CoV2 - Australia : GCCTCGGCAAAAACGTACTGCCACTAAAGCATACAATGTAACACAAGCTTTCGGCAGACGTGGTCCAGAA : 840
SARS-CoV2 - Taiwan : GCCTCGGCAAAAACGTACTGCCACTAAAGCATACAATGTAACACAAGCTTTCGGCAGACGTGGTCCAGAA : 840
SARS-CoV2 - Italy : GCCTCGGCAAAAACGTACTGCCACTAAAGCATACAATGTAACACAAGCTTTCGGCAGACGTGGTCCAGAA : 840
SARS-CoV2 - India : GCCTCGGCAAAAACGTACTGCCACTAAAGCATACAATGTAACACAAGCTTTCGGCAGACGTGGTCCAGAA : 840
SARS-CoV2 - Sweden : GCCTCGGCAAAAACGTACTGCCACTAAAGCATACAATGTAACACAAGCTTTCGGCAGACGTGGTCCAGAA : 840
SARS-CoV2 - Spain : GCCTCGGCAAAAACGTACTGCCACTAAAGCATACAATGTAACACAAGCTTTCGGCAGACGTGGTCCAGAA : 840
SARS-CoV2 - Brazil : GCCTCGGCAAAAACGTACTGCCACTAAAGCATACAATGTAACACAAGCTTTCGGCAGACGTGGTCCAGAA : 840
SARS-CoV2 - Pakistan : GCCTCGGCAAAAACGTACTGCCACTAAAGCATACAATGTAACACAAGCTTTCGGCAGACGTGGTCCAGAA : 840

```



**Suppl. Fig. 2.** Partial sequence alignment of the new coronavirus (SARS-CoV2) genome deposited at the GenBank. **(A)** Partial alignment of the E gene. **(B)** Partial alignment of the RdRp gene. The colors blue, red and green of the lines correspond to the forward and reverse primers and the probe, respectively, as recommended by the Institut Pasteur /France.

**A**

```

                                ACAGGTACGTTAATAGTTAATAGCGT
SARS-CoV2 - China/Wuhan-Hu-1 : ATGTACTCATTGCTTTTCGGAAGAGACAGGTACGTTAATAGTTAATAGCGTACTTCTTTTCTTGCTTTCC : 7C
SARS-CoV2 - Japan : ATGTACTCATTGCTTTTCGGAAGAGACAGGTACGTTAATAGTTAATAGCGTACTTCTTTTCTTGCTTTCC : 7C
SARS-CoV2 - South Korea : ATGTACTCATTGCTTTTCGGAAGAGACAGGTACGTTAATAGTTAATAGCGTACTTCTTTTCTTGCTTTCC : 7C
SARS-CoV2 - Nepal : ATGTACTCATTGCTTTTCGGAAGAGACAGGTACGTTAATAGTTAATAGCGTACTTCTTTTCTTGCTTTCC : 7C
SARS-CoV2 - USA : ATGTACTCATTGCTTTTCGGAAGAGACAGGTACGTTAATAGTTAATAGCGTACTTCTTTTCTTGCTTTCC : 7C
SARS-CoV2 - Viet Nam : ATGTACTCATTGCTTTTCGGAAGAGACAGGTACGTTAATAGTTAATAGCGTACTTCTTTTCTTGCTTTCC : 7C
SARS-CoV2 - Australia : ATGTACTCATTGCTTTTCGGAAGAGACAGGTACGTTAATAGTTAATAGCGTACTTCTTTTCTTGCTTTCC : 7C
SARS-CoV2 - Taiwan : ATGTACTCATTGCTTTTCGGAAGAGACAGGTACGTTAATAGTTAATAGCGTACTTCTTTTCTTGCTTTCC : 7C
SARS-CoV2 - Italy : ATGTACTCATTGCTTTTCGGAAGAGACAGGTACGTTAATAGTTAATAGCGTACTTCTTTTCTTGCTTTCC : 7C
SARS-CoV2 - India : ATGTACTCATTGCTTTTCGGAAGAGACAGGTACGTTAATAGTTAATAGCGTACTTCTTTTCTTGCTTTCC : 7C
SARS-CoV2 - Sweden : ATGTACTCATTGCTTTTCGGAAGAGACAGGTACGTTAATAGTTAATAGCGTACTTCTTTTCTTGCTTTCC : 7C
SARS-CoV2 - Spain : ATGTACTCATTGCTTTTCGGAAGAGACAGGTACGTTAATAGTTAATAGCGTACTTCTTTTCTTGCTTTCC : 7C
SARS-CoV2 - Brazil : ATGTACTCATTGCTTTTCGGAAGAGACAGGTACGTTAATAGTTAATAGCGTACTTCTTTTCTTGCTTTCC : 7C
SARS-CoV2 - Pakistan : ATGTACTCATTGCTTTTCGGAAGAGACAGGTACGTTAATAGTTAATAGCGTACTTCTTTTCTTGCTTTCC : 7C

```

```

                                ACACATAGCCATCCTTACTGCGCTTCG ATATTGCAGCAGTACGCACACA
SARS-CoV2 - China/Wuhan-Hu-1 : TGGTATTCTTGCTAGTTACACTAGCCATCCTTACTGCGCTTCGATTGTGTGCGTACTGCTGCAATATTGT : 14C
SARS-CoV2 - Japan : TGGTATTCTTGCTAGTTACACTAGCCATCCTTACTGCGCTTCGATTGTGTGCGTACTGCTGCAATATTGT : 14C
SARS-CoV2 - South Korea : TGGTATTCTTGCTAGTTACACTAGCCATCCTTACTGCGCTTCGATTGTGTGCGTACTGCTGCAATATTGT : 14C
SARS-CoV2 - Nepal : TGGTATTCTTGCTAGTTACACTAGCCATCCTTACTGCGCTTCGATTGTGTGCGTACTGCTGCAATATTGT : 14C
SARS-CoV2 - USA : TGGTATTCTTGCTAGTTACACTAGCCATCCTTACTGCGCTTCGATTGTGTGCGTACTGCTGCAATATTGT : 14C
SARS-CoV2 - Viet Nam : TGGTATTCTTGCTAGTTACACTAGCCATCCTTACTGCGCTTCGATTGTGTGCGTACTGCTGCAATATTGT : 14C
SARS-CoV2 - Australia : TGGTATTCTTGCTAGTTACACTAGCCATCCTTACTGCGCTTCGATTGTGTGCGTACTGCTGCAATATTGT : 14C
SARS-CoV2 - Taiwan : TGGTATTCTTGCTAGTTACACTAGCCATCCTTACTGCGCTTCGATTGTGTGCGTACTGCTGCAATATTGT : 14C
SARS-CoV2 - Italy : TGGTATTCTTGCTAGTTACACTAGCCATCCTTACTGCGCTTCGATTGTGTGCGTACTGCTGCAATATTGT : 14C
SARS-CoV2 - India : TGGTATTCTTGCTAGTTACACTAGCCATCCTTACTGCGCTTCGATTGTGTGCGTACTGCTGCAATATTGT : 14C
SARS-CoV2 - Sweden : TGGTATTCTTGCTAGTTACACTAGCCATCCTTACTGCGCTTCGATTGTGTGCGTACTGCTGCAATATTGT : 14C
SARS-CoV2 - Spain : TGGTATTCTTGCTAGTTACACTAGCCATCCTTACTGCGCTTCGATTGTGTGCGTACTGCTGCAATATTGT : 14C
SARS-CoV2 - Brazil : TGGTATTCTTGCTAGTTACACTAGCCATCCTTACTGCGCTTCGATTGTGTGCGTACTGCTGCAATATTGT : 14C
SARS-CoV2 - Pakistan : TGGTATTCTTGCTAGTTACACTAGCCATCCTTACTGCGCTTCGATTGTGTGCGTACTGCTGCAATATTGT : 14C

```

```

SARS-CoV2 - China/Wuhan-Hu-1 : TAACGTGAGTCTTGTA AAAACCTTCTTTTACGTTTACTCTCGTGTAAAAATCTGAATCTTCTAGAGTT : 210
SARS-CoV2 - Japan : TAACGTGAGTCTTGTA AAAACCTTCTTTTACGTTTACTCTCGTGTAAAAATCTGAATCTTCTAGAGTT : 210
SARS-CoV2 - South Korea : TAACGTGAGTCTTGTA AAAACCTTCTTTTACGTTTACTCTCGTGTAAAAATCTGAATCTTCTAGAGTT : 210
SARS-CoV2 - Nepal : TAACGTGAGTCTTGTA AAAACCTTCTTTTACGTTTACTCTCGTGTAAAAATCTGAATCTTCTAGAGTT : 210
SARS-CoV2 - USA : TAACGTGAGTCTTGTA AAAACCTTCTTTTACGTTTACTCTCGTGTAAAAATCTGAATCTTCTAGAGTT : 210
SARS-CoV2 - Viet Nam : TAACGTGAGTCTTGTA AAAACCTTCTTTTACGTTTACTCTCGTGTAAAAATCTGAATCTTCTAGAGTT : 210
SARS-CoV2 - Australia : TAACGTGAGTCTTGTA AAAACCTTCTTTTACGTTTACTCTCGTGTAAAAATCTGAATCTTCTAGAGTT : 210
SARS-CoV2 - Taiwan : TAACGTGAGTCTTGTA AAAACCTTCTTTTACGTTTACTCTCGTGTAAAAATCTGAATCTTCTAGAGTT : 210
SARS-CoV2 - Italy : TAACGTGAGTCTTGTA AAAACCTTCTTTTACGTTTACTCTCGTGTAAAAATCTGAATCTTCTAGAGTT : 210
SARS-CoV2 - India : TAACGTGAGTCTTGTA AAAACCTTCTTTTACGTTTACTCTCGTGTAAAAATCTGAATCTTCTAGAGTT : 210
SARS-CoV2 - Sweden : TAACGTGAGTCTTGTA AAAACCTTCTTTTACGTTTACTCTCGTGTAAAAATCTGAATCTTCTAGAGTT : 210
SARS-CoV2 - Spain : TAACGTGAGTCTTGTA AAAACCTTCTTTTACGTTTACTCTCGTGTAAAAATCTGAATCTTCTAGAGTT : 210
SARS-CoV2 - Brazil : TAACGTGAGTCTTGTA AAAACCTTCTTTTACGTTTACTCTCGTGTAAAAATCTGAATCTTCTAGAGTT : 210
SARS-CoV2 - Pakistan : TAACGTGAGTCTTGTA AAAACCTTCTTTTACGTTTACTCTCGTGTAAAAATCTGAATCTTCTAGAGTT : 210

```

```

SARS-CoV2 - China/Wuhan-Hu-1 : CCTGATCTTCTGGTCTAA : 228
SARS-CoV2 - Japan : CCTGATCTTCTGGTCTAA : 228
SARS-CoV2 - South Korea : CCTGATCTTCTGGTCTAA : 228
SARS-CoV2 - Nepal : CCTGATCTTCTGGTCTAA : 228
SARS-CoV2 - USA : CCTGATCTTCTGGTCTAA : 228
SARS-CoV2 - Viet Nam : CCTGATCTTCTGGTCTAA : 228
SARS-CoV2 - Australia : CCTGATCTTCTGGTCTAA : 228
SARS-CoV2 - Taiwan : CCTGATCTTCTGGTCTAA : 228
SARS-CoV2 - Italy : CCTGATCTTCTGGTCTAA : 228
SARS-CoV2 - India : CCTGATCTTCTGGTCTAA : 228
SARS-CoV2 - Sweden : CCTGATCTTCTGGTCTAA : 228
SARS-CoV2 - Spain : CCTGATCTTCTGGTCTAA : 228
SARS-CoV2 - Brazil : CCTGATCTTCTGGTCTAA : 228
SARS-CoV2 - Pakistan : CCTGATCTTCTGGTCTAA : 228

```

B

SARS-CoV2 - China/Wuhan-Hu-1 : AATGTTCAACTAGTGA... 12390
SARS-CoV2 - Japan : AATGTTCAACTAGTGA... 12390
SARS-CoV2 - South Korea : AATGTTCAACTAGTGA... 12390
SARS-CoV2 - Nepal : AATGTTCAACTAGTGA... 12390
SARS-CoV2 - USA : AATGTTCAACTAGTGA... 12390
SARS-CoV2 - Viet Nam : AATGTTCAACTAGTGA... 12390
SARS-CoV2 - Australia : AATGTTCAACTAGTGA... 12390
SARS-CoV2 - Taiwan : AATGTTCAACTAGTGA... 12390
SARS-CoV2 - Italy : AATGTTCAACTAGTGA... 12390
SARS-CoV2 - India : AATGTTCAACTAGTGA... 12390
SARS-CoV2 - Sweden : AATGTTCAACTAGTGA... 12390
SARS-CoV2 - Spain : AATGTTCAACTAGTGA... 12390
SARS-CoV2 - Brazil : AATGTTCAACTAGTGA... 12390
SARS-CoV2 - Pakistan : AATGTTCAACTAGTGA... 12390

ATGAGCTTAGTCCTGTG AGATGCTT
SARS-CoV2 - China/Wuhan-Hu-1 : TTAAGGGCAATTCGCTG... 12460
SARS-CoV2 - Japan : TTAAGGGCAATTCGCTG... 12460
SARS-CoV2 - South Korea : TTAAGGGCAATTCGCTG... 12460
SARS-CoV2 - Nepal : TTAAGGGCAATTCGCTG... 12460
SARS-CoV2 - USA : TTAAGGGCAATTCGCTG... 12460
SARS-CoV2 - Viet Nam : TTAAGGGCAATTCGCTG... 12460
SARS-CoV2 - Australia : TTAAGGGCAATTCGCTG... 12460
SARS-CoV2 - Taiwan : TTAAGGGCAATTCGCTG... 12460
SARS-CoV2 - Italy : TTAAGGGCAATTCGCTG... 12460
SARS-CoV2 - India : TTAAGGGCAATTCGCTG... 12460
SARS-CoV2 - Sweden : TTAAGGGCAATTCGCTG... 12460
SARS-CoV2 - Spain : TTAAGGGCAATTCGCTG... 12460
SARS-CoV2 - Brazil : TTAAGGGCAATTCGCTG... 12460
SARS-CoV2 - Pakistan : TTAAGGGCAATTCGCTG... 12460

GTGCTGCCGTTA CTCCTTTGTGTGTT
SARS-CoV2 - China/Wuhan-Hu-1 : GTGCTGCCGTTACTACA... 12530
SARS-CoV2 - Japan : GTGCTGCCGTTACTACA... 12530
SARS-CoV2 - South Korea : GTGCTGCCGTTACTACA... 12530
SARS-CoV2 - Nepal : GTGCTGCCGTTACTACA... 12530
SARS-CoV2 - USA : GTGCTGCCGTTACTACA... 12530
SARS-CoV2 - Viet Nam : GTGCTGCCGTTACTACA... 12530
SARS-CoV2 - Australia : GTGCTGCCGTTACTACA... 12530
SARS-CoV2 - Taiwan : GTGCTGCCGTTACTACA... 12530
SARS-CoV2 - Italy : GTGCTGCCGTTACTACA... 12530
SARS-CoV2 - India : GTGCTGCCGTTACTACA... 12530
SARS-CoV2 - Sweden : GTGCTGCCGTTACTACA... 12530
SARS-CoV2 - Spain : GTGCTGCCGTTACTACA... 12530
SARS-CoV2 - Brazil : GTGCTGCCGTTACTACA... 12530
SARS-CoV2 - Pakistan : GTGCTGCCGTTACTACA... 12530

GT
SARS-CoV2 - China/Wuhan-Hu-1 : AGGTAGTGTGACTTGC... 12600
SARS-CoV2 - Japan : AGGTAGTGTGACTTGC... 12600
SARS-CoV2 - South Korea : AGGTAGTGTGACTTGC... 12600
SARS-CoV2 - Nepal : AGGTAGTGTGACTTGC... 12600
SARS-CoV2 - USA : AGGTAGTGTGACTTGC... 12600
SARS-CoV2 - Viet Nam : AGGTAGTGTGACTTGC... 12600
SARS-CoV2 - Australia : AGGTAGTGTGACTTGC... 12600
SARS-CoV2 - Taiwan : AGGTAGTGTGACTTGC... 12600
SARS-CoV2 - Italy : AGGTAGTGTGACTTGC... 12600
SARS-CoV2 - India : AGGTAGTGTGACTTGC... 12600
SARS-CoV2 - Sweden : AGGTAGTGTGACTTGC... 12600
SARS-CoV2 - Spain : AGGTAGTGTGACTTGC... 12600
SARS-CoV2 - Brazil : AGGTAGTGTGACTTGC... 12600
SARS-CoV2 - Pakistan : AGGTAGTGTGACTTGC... 12600

AGCCCAAGCTTTGTA... 13790
SARS-CoV2 - China/Wuhan-Hu-1 : AGCCCAAGCTTTGTA... 13790
SARS-CoV2 - Japan : AGCCCAAGCTTTGTA... 13790
SARS-CoV2 - South Korea : AGCCCAAGCTTTGTA... 13790
SARS-CoV2 - Nepal : AGCCCAAGCTTTGTA... 13790
SARS-CoV2 - USA : AGCCCAAGCTTTGTA... 13790
SARS-CoV2 - Viet Nam : AGCCCAAGCTTTGTA... 13790
SARS-CoV2 - Australia : AGCCCAAGCTTTGTA... 13790
SARS-CoV2 - Taiwan : AGCCCAAGCTTTGTA... 13790
SARS-CoV2 - Italy : AGCCCAAGCTTTGTA... 13790
SARS-CoV2 - India : AGCCCAAGCTTTGTA... 13790
SARS-CoV2 - Sweden : AGCCCAAGCTTTGTA... 13790
SARS-CoV2 - Spain : AGCCCAAGCTTTGTA... 13790
SARS-CoV2 - Brazil : AGCCCAAGCTTTGTA... 13790
SARS-CoV2 - Pakistan : AGCCCAAGCTTTGTA... 13790

GGTAAGTGGTATGATTCG TCATACAAACCCAGCCAGG
SARS-CoV2 - China/Wuhan-Hu-1 : ACATPAGATAATCA... 13860
SARS-CoV2 - Japan : ACATPAGATAATCA... 13860
SARS-CoV2 - South Korea : ACATPAGATAATCA... 13860
SARS-CoV2 - Nepal : ACATPAGATAATCA... 13860
SARS-CoV2 - USA : ACATPAGATAATCA... 13860
SARS-CoV2 - Viet Nam : ACATPAGATAATCA... 13860
SARS-CoV2 - Australia : ACATPAGATAATCA... 13860
SARS-CoV2 - Taiwan : ACATPAGATAATCA... 13860
SARS-CoV2 - Italy : ACATPAGATAATCA... 13860
SARS-CoV2 - India : ACATPAGATAATCA... 13860
SARS-CoV2 - Sweden : ACATPAGATAATCA... 13860
SARS-CoV2 - Spain : ACATPAGATAATCA... 13860
SARS-CoV2 - Brazil : ACATPAGATAATCA... 13860
SARS-CoV2 - Pakistan : ACATPAGATAATCA... 13860

CTGGTCAAGGTTAATATAGG
SARS-CoV2 - China/Wuhan-Hu-1 : GTGGAGTCCCGTGTG... 13930
SARS-CoV2 - Japan : GTGGAGTCCCGTGTG... 13930
SARS-CoV2 - South Korea : GTGGAGTCCCGTGTG... 13930
SARS-CoV2 - Nepal : GTGGAGTCCCGTGTG... 13930
SARS-CoV2 - USA : GTGGAGTCCCGTGTG... 13930
SARS-CoV2 - Viet Nam : GTGGAGTCCCGTGTG... 13930
SARS-CoV2 - Australia : GTGGAGTCCCGTGTG... 13930
SARS-CoV2 - Taiwan : GTGGAGTCCCGTGTG... 13930
SARS-CoV2 - Italy : GTGGAGTCCCGTGTG... 13930
SARS-CoV2 - India : GTGGAGTCCCGTGTG... 13930
SARS-CoV2 - Sweden : GTGGAGTCCCGTGTG... 13930
SARS-CoV2 - Spain : GTGGAGTCCCGTGTG... 13930
SARS-CoV2 - Brazil : GTGGAGTCCCGTGTG... 13930
SARS-CoV2 - Pakistan : GTGGAGTCCCGTGTG... 13930

TCGACAGTCCAGCTG... 14000
SARS-CoV2 - China/Wuhan-Hu-1 : TCGACAGTCCAGCTG... 14000
SARS-CoV2 - Japan : TCGACAGTCCAGCTG... 14000
SARS-CoV2 - South Korea : TCGACAGTCCAGCTG... 14000
SARS-CoV2 - Nepal : TCGACAGTCCAGCTG... 14000
SARS-CoV2 - USA : TCGACAGTCCAGCTG... 14000
SARS-CoV2 - Viet Nam : TCGACAGTCCAGCTG... 14000
SARS-CoV2 - Australia : TCGACAGTCCAGCTG... 14000
SARS-CoV2 - Taiwan : TCGACAGTCCAGCTG... 14000
SARS-CoV2 - Italy : TCGACAGTCCAGCTG... 14000
SARS-CoV2 - India : TCGACAGTCCAGCTG... 14000
SARS-CoV2 - Sweden : TCGACAGTCCAGCTG... 14000
SARS-CoV2 - Spain : TCGACAGTCCAGCTG... 14000
SARS-CoV2 - Brazil : TCGACAGTCCAGCTG... 14000
SARS-CoV2 - Pakistan : TCGACAGTCCAGCTG... 14000

**Suppl. Fig. 3.** Partial sequence alignment of the new coronavirus (SARS-CoV2) genome deposited at the GenBank. **(A)** Partial alignment of the E gene. **(B)** Partial alignment of the RdRp gene. The colors blue, red and green of the lines correspond to the forward and reverse primers and the probe, respectively, as recommended by Charité - Universitätsmedizin Berlin/Germany.

**A**

|                              | <b>ACAGGTACGTTAATAGTTAATAGCGT</b> |    |
|------------------------------|-----------------------------------|----|
| SARS-CoV2 - China/Wuhan-Hu-1 | ATGTA                             | 70 |
| SARS-CoV2 - Japan            | ATGTA                             | 70 |
| SARS-CoV2 - South Korea      | ATGTA                             | 70 |
| SARS-CoV2 - Nepal            | ATGTA                             | 70 |
| SARS-CoV2 - USA              | ATGTA                             | 70 |
| SARS-CoV2 - Viet Nam         | ATGTA                             | 70 |
| SARS-CoV2 - Australia        | ATGTA                             | 70 |
| SARS-CoV2 - Taiwan           | ATGTA                             | 70 |
| SARS-CoV2 - Italy            | ATGTA                             | 70 |
| SARS-CoV2 - India            | ATGTA                             | 70 |
| SARS-CoV2 - Sweden           | ATGTA                             | 70 |
| SARS-CoV2 - Spain            | ATGTA                             | 70 |
| SARS-CoV2 - Brazil           | ATGTA                             | 70 |
| SARS-CoV2 - Pakistan         | ATGTA                             | 70 |

  

|                              | <b>ACACTAGCCATCCTTACTGCGCTTCG</b>      | <b>ATATTGCAGCAGTACGCACACA</b>          |     |
|------------------------------|----------------------------------------|----------------------------------------|-----|
| SARS-CoV2 - China/Wuhan-Hu-1 | TGGTATTCTGCTAGTTACACTAGCCATCCTTACTGCGG | TGGTATTCTGCTAGTTACACTAGCCATCCTTACTGCGG | 140 |
| SARS-CoV2 - Japan            | TGGTATTCTGCTAGTTACACTAGCCATCCTTACTGCGG | TGGTATTCTGCTAGTTACACTAGCCATCCTTACTGCGG | 140 |
| SARS-CoV2 - South Korea      | TGGTATTCTGCTAGTTACACTAGCCATCCTTACTGCGG | TGGTATTCTGCTAGTTACACTAGCCATCCTTACTGCGG | 140 |
| SARS-CoV2 - Nepal            | TGGTATTCTGCTAGTTACACTAGCCATCCTTACTGCGG | TGGTATTCTGCTAGTTACACTAGCCATCCTTACTGCGG | 140 |
| SARS-CoV2 - USA              | TGGTATTCTGCTAGTTACACTAGCCATCCTTACTGCGG | TGGTATTCTGCTAGTTACACTAGCCATCCTTACTGCGG | 140 |
| SARS-CoV2 - Viet Nam         | TGGTATTCTGCTAGTTACACTAGCCATCCTTACTGCGG | TGGTATTCTGCTAGTTACACTAGCCATCCTTACTGCGG | 140 |
| SARS-CoV2 - Australia        | TGGTATTCTGCTAGTTACACTAGCCATCCTTACTGCGG | TGGTATTCTGCTAGTTACACTAGCCATCCTTACTGCGG | 140 |
| SARS-CoV2 - Taiwan           | TGGTATTCTGCTAGTTACACTAGCCATCCTTACTGCGG | TGGTATTCTGCTAGTTACACTAGCCATCCTTACTGCGG | 140 |
| SARS-CoV2 - Italy            | TGGTATTCTGCTAGTTACACTAGCCATCCTTACTGCGG | TGGTATTCTGCTAGTTACACTAGCCATCCTTACTGCGG | 140 |
| SARS-CoV2 - India            | TGGTATTCTGCTAGTTACACTAGCCATCCTTACTGCGG | TGGTATTCTGCTAGTTACACTAGCCATCCTTACTGCGG | 140 |
| SARS-CoV2 - Sweden           | TGGTATTCTGCTAGTTACACTAGCCATCCTTACTGCGG | TGGTATTCTGCTAGTTACACTAGCCATCCTTACTGCGG | 140 |
| SARS-CoV2 - Spain            | TGGTATTCTGCTAGTTACACTAGCCATCCTTACTGCGG | TGGTATTCTGCTAGTTACACTAGCCATCCTTACTGCGG | 140 |
| SARS-CoV2 - Brazil           | TGGTATTCTGCTAGTTACACTAGCCATCCTTACTGCGG | TGGTATTCTGCTAGTTACACTAGCCATCCTTACTGCGG | 140 |
| SARS-CoV2 - Pakistan         | TGGTATTCTGCTAGTTACACTAGCCATCCTTACTGCGG | TGGTATTCTGCTAGTTACACTAGCCATCCTTACTGCGG | 140 |

  

|                              |     |     |
|------------------------------|-----|-----|
| SARS-CoV2 - China/Wuhan-Hu-1 | TAA | 210 |
| SARS-CoV2 - Japan            | TAA | 210 |
| SARS-CoV2 - South Korea      | TAA | 210 |
| SARS-CoV2 - Nepal            | TAA | 210 |
| SARS-CoV2 - USA              | TAA | 210 |
| SARS-CoV2 - Viet Nam         | TAA | 210 |
| SARS-CoV2 - Australia        | TAA | 210 |
| SARS-CoV2 - Taiwan           | TAA | 210 |
| SARS-CoV2 - Italy            | TAA | 210 |
| SARS-CoV2 - India            | TAA | 210 |
| SARS-CoV2 - Sweden           | TAA | 210 |
| SARS-CoV2 - Spain            | TAA | 210 |
| SARS-CoV2 - Brazil           | TAA | 210 |
| SARS-CoV2 - Pakistan         | TAA | 210 |

  

|                              |                    |     |
|------------------------------|--------------------|-----|
| SARS-CoV2 - China/Wuhan-Hu-1 | CCTGATCTTCTGGTCTAA | 228 |
| SARS-CoV2 - Japan            | CCTGATCTTCTGGTCTAA | 228 |
| SARS-CoV2 - South Korea      | CCTGATCTTCTGGTCTAA | 228 |
| SARS-CoV2 - Nepal            | CCTGATCTTCTGGTCTAA | 228 |
| SARS-CoV2 - USA              | CCTGATCTTCTGGTCTAA | 228 |
| SARS-CoV2 - Viet Nam         | CCTGATCTTCTGGTCTAA | 228 |
| SARS-CoV2 - Australia        | CCTGATCTTCTGGTCTAA | 228 |
| SARS-CoV2 - Taiwan           | CCTGATCTTCTGGTCTAA | 228 |
| SARS-CoV2 - Italy            | CCTGATCTTCTGGTCTAA | 228 |
| SARS-CoV2 - India            | CCTGATCTTCTGGTCTAA | 228 |
| SARS-CoV2 - Sweden           | CCTGATCTTCTGGTCTAA | 228 |
| SARS-CoV2 - Spain            | CCTGATCTTCTGGTCTAA | 228 |
| SARS-CoV2 - Brazil           | CCTGATCTTCTGGTCTAA | 228 |
| SARS-CoV2 - Pakistan         | CCTGATCTTCTGGTCTAA | 228 |



**Suppl. Fig. 4.** Partial sequence alignment of the new coronavirus (SARS-CoV2) genome deposited at the GenBank. **(A)** Partial alignment of the N gene. **(B)** Partial alignment of the NSP14 gene. The colors blue, red and green of the lines correspond to the forward and reverse primers and the probe, respectively, as recommended by the University of Hong Kong.

**A**

|                              | <u>TAATCAGACAAGGAACTGATTA</u>                                             | <u>CCGCAAA</u> |       |
|------------------------------|---------------------------------------------------------------------------|----------------|-------|
| SARS-CoV2 - China/Wuhan-Hu-1 | CAAACCCAAAGGAAATTTGGGGACCAGGAACATAATCAGACAAGGAACTGATTACAAAACATTGGCCGCAAAA |                | : 910 |
| SARS-CoV2 - Japan            | CAAACCCAAAGGAAATTTGGGGACCAGGAACATAATCAGACAAGGAACTGATTACAAAACATTGGCCGCAAAA |                | : 910 |
| SARS-CoV2 - South Korea      | CAAACCCAAAGGAAATTTGGGGACCAGGAACATAATCAGACAAGGAACTGATTACAAAACATTGGCCGCAAAA |                | : 910 |
| SARS-CoV2 - Nepal            | CAAACCCAAAGGAAATTTGGGGACCAGGAACATAATCAGACAAGGAACTGATTACAAAACATTGGCCGCAAAA |                | : 910 |
| SARS-CoV2 - USA              | CAAACCCAAAGGAAATTTGGGGACCAGGAACATAATCAGACAAGGAACTGATTACAAAACATTGGCCGCAAAA |                | : 910 |
| SARS-CoV2 - Viet Nam         | CAAACCCAAAGGAAATTTGGGGACCAGGAACATAATCAGACAAGGAACTGATTACAAAACATTGGCCGCAAAA |                | : 910 |
| SARS-CoV2 - Australia        | CAAACCCAAAGGAAATTTGGGGACCAGGAACATAATCAGACAAGGAACTGATTACAAAACATTGGCCGCAAAA |                | : 910 |
| SARS-CoV2 - Taiwan           | CAAACCCAAAGGAAATTTGGGGACCAGGAACATAATCAGACAAGGAACTGATTACAAAACATTGGCCGCAAAA |                | : 910 |
| SARS-CoV2 - Italy            | CAAACCCAAAGGAAATTTGGGGACCAGGAACATAATCAGACAAGGAACTGATTACAAAACATTGGCCGCAAAA |                | : 910 |
| SARS-CoV2 - India            | CAAACCCAAAGGAAATTTGGGGACCAGGAACATAATCAGACAAGGAACTGATTACAAAACATTGGCCGCAAAA |                | : 910 |
| SARS-CoV2 - Sweden           | CAAACCCAAAGGAAATTTGGGGACCAGGAACATAATCAGACAAGGAACTGATTACAAAACATTGGCCGCAAAA |                | : 910 |
| SARS-CoV2 - Spain            | CAAACCCAAAGGAAATTTGGGGACCAGGAACATAATCAGACAAGGAACTGATTACAAAACATTGGCCGCAAAA |                | : 910 |
| SARS-CoV2 - Brazil           | CAAACCCAAAGGAAATTTGGGGACCAGGAACATAATCAGACAAGGAACTGATTACAAAACATTGGCCGCAAAA |                | : 910 |
| SARS-CoV2 - Pakistan         | CAAACCCAAAGGAAATTTGGGGACCAGGAACATAATCAGACAAGGAACTGATTACAAAACATTGGCCGCAAAA |                | : 910 |

|                              | <u>TTGCACAATTTGC</u>                                                    | <u>CGAAGGTGTGACTTCCAT</u> |       |
|------------------------------|-------------------------------------------------------------------------|---------------------------|-------|
| SARS-CoV2 - China/Wuhan-Hu-1 | TTGCACAATTTGCCCCACGGCTTCAGCGTTCCTCGGAATGTCGCGCATTTGGCATGGAAGTTCACACCTTC |                           | : 980 |
| SARS-CoV2 - Japan            | TTGCACAATTTGCCCCACGGCTTCAGCGTTCCTCGGAATGTCGCGCATTTGGCATGGAAGTTCACACCTTC |                           | : 980 |
| SARS-CoV2 - South Korea      | TTGCACAATTTGCCCCACGGCTTCAGCGTTCCTCGGAATGTCGCGCATTTGGCATGGAAGTTCACACCTTC |                           | : 980 |
| SARS-CoV2 - Nepal            | TTGCACAATTTGCCCCACGGCTTCAGCGTTCCTCGGAATGTCGCGCATTTGGCATGGAAGTTCACACCTTC |                           | : 980 |
| SARS-CoV2 - USA              | TTGCACAATTTGCCCCACGGCTTCAGCGTTCCTCGGAATGTCGCGCATTTGGCATGGAAGTTCACACCTTC |                           | : 980 |
| SARS-CoV2 - Viet Nam         | TTGCACAATTTGCCCCACGGCTTCAGCGTTCCTCGGAATGTCGCGCATTTGGCATGGAAGTTCACACCTTC |                           | : 980 |
| SARS-CoV2 - Australia        | TTGCACAATTTGCCCCACGGCTTCAGCGTTCCTCGGAATGTCGCGCATTTGGCATGGAAGTTCACACCTTC |                           | : 980 |
| SARS-CoV2 - Taiwan           | TTGCACAATTTGCCCCACGGCTTCAGCGTTCCTCGGAATGTCGCGCATTTGGCATGGAAGTTCACACCTTC |                           | : 980 |
| SARS-CoV2 - Italy            | TTGCACAATTTGCCCCACGGCTTCAGCGTTCCTCGGAATGTCGCGCATTTGGCATGGAAGTTCACACCTTC |                           | : 980 |
| SARS-CoV2 - India            | TTGCACAATTTGCCCCACGGCTTCAGCGTTCCTCGGAATGTCGCGCATTTGGCATGGAAGTTCACACCTTC |                           | : 980 |
| SARS-CoV2 - Sweden           | TTGCACAATTTGCCCCACGGCTTCAGCGTTCCTCGGAATGTCGCGCATTTGGCATGGAAGTTCACACCTTC |                           | : 980 |
| SARS-CoV2 - Spain            | TTGCACAATTTGCCCCACGGCTTCAGCGTTCCTCGGAATGTCGCGCATTTGGCATGGAAGTTCACACCTTC |                           | : 980 |
| SARS-CoV2 - Brazil           | TTGCACAATTTGCCCCACGGCTTCAGCGTTCCTCGGAATGTCGCGCATTTGGCATGGAAGTTCACACCTTC |                           | : 980 |
| SARS-CoV2 - Pakistan         | TTGCACAATTTGCCCCACGGCTTCAGCGTTCCTCGGAATGTCGCGCATTTGGCATGGAAGTTCACACCTTC |                           | : 980 |

|                              | <u>G</u>                                                                |        |
|------------------------------|-------------------------------------------------------------------------|--------|
| SARS-CoV2 - China/Wuhan-Hu-1 | GGGAACGTGGTTGACCTACACAGGTGCCATCAAATTTGGATGACAAAGATCCAAATTTCAAAGATCAAGTC | : 1050 |
| SARS-CoV2 - Japan            | GGGAACGTGGTTGACCTACACAGGTGCCATCAAATTTGGATGACAAAGATCCAAATTTCAAAGATCAAGTC | : 1050 |
| SARS-CoV2 - South Korea      | GGGAACGTGGTTGACCTACACAGGTGCCATCAAATTTGGATGACAAAGATCCAAATTTCAAAGATCAAGTC | : 1050 |
| SARS-CoV2 - Nepal            | GGGAACGTGGTTGACCTACACAGGTGCCATCAAATTTGGATGACAAAGATCCAAATTTCAAAGATCAAGTC | : 1050 |
| SARS-CoV2 - USA              | GGGAACGTGGTTGACCTACACAGGTGCCATCAAATTTGGATGACAAAGATCCAAATTTCAAAGATCAAGTC | : 1050 |
| SARS-CoV2 - Viet Nam         | GGGAACGTGGTTGACCTACACAGGTGCCATCAAATTTGGATGACAAAGATCCAAATTTCAAAGATCAAGTC | : 1050 |
| SARS-CoV2 - Australia        | GGGAACGTGGTTGACCTACACAGGTGCCATCAAATTTGGATGACAAAGATCCAAATTTCAAAGATCAAGTC | : 1050 |
| SARS-CoV2 - Taiwan           | GGGAACGTGGTTGACCTACACAGGTGCCATCAAATTTGGATGACAAAGATCCAAATTTCAAAGATCAAGTC | : 1050 |
| SARS-CoV2 - Italy            | GGGAACGTGGTTGACCTACACAGGTGCCATCAAATTTGGATGACAAAGATCCAAATTTCAAAGATCAAGTC | : 1050 |
| SARS-CoV2 - India            | GGGAACGTGGTTGACCTACACAGGTGCCATCAAATTTGGATGACAAAGATCCAAATTTCAAAGATCAAGTC | : 1050 |
| SARS-CoV2 - Sweden           | GGGAACGTGGTTGACCTACACAGGTGCCATCAAATTTGGATGACAAAGATCCAAATTTCAAAGATCAAGTC | : 1050 |
| SARS-CoV2 - Spain            | GGGAACGTGGTTGACCTACACAGGTGCCATCAAATTTGGATGACAAAGATCCAAATTTCAAAGATCAAGTC | : 1050 |
| SARS-CoV2 - Brazil           | GGGAACGTGGTTGACCTACACAGGTGCCATCAAATTTGGATGACAAAGATCCAAATTTCAAAGATCAAGTC | : 1050 |
| SARS-CoV2 - Pakistan         | GGGAACGTGGTTGACCTACACAGGTGCCATCAAATTTGGATGACAAAGATCCAAATTTCAAAGATCAAGTC | : 1050 |

|                              |                                                                       |        |
|------------------------------|-----------------------------------------------------------------------|--------|
| SARS-CoV2 - China/Wuhan-Hu-1 | ATTTTGCTGAATAAGCATATTGACGCATACAAAACATTTCCACCAACAGAGCCTAAAAAGGACAAAAGA | : 1120 |
| SARS-CoV2 - Japan            | ATTTTGCTGAATAAGCATATTGACGCATACAAAACATTTCCACCAACAGAGCCTAAAAAGGACAAAAGA | : 1120 |
| SARS-CoV2 - South Korea      | ATTTTGCTGAATAAGCATATTGACGCATACAAAACATTTCCACCAACAGAGCCTAAAAAGGACAAAAGA | : 1120 |
| SARS-CoV2 - Nepal            | ATTTTGCTGAATAAGCATATTGACGCATACAAAACATTTCCACCAACAGAGCCTAAAAAGGACAAAAGA | : 1120 |
| SARS-CoV2 - USA              | ATTTTGCTGAATAAGCATATTGACGCATACAAAACATTTCCACCAACAGAGCCTAAAAAGGACAAAAGA | : 1120 |
| SARS-CoV2 - Viet Nam         | ATTTTGCTGAATAAGCATATTGACGCATACAAAACATTTCCACCAACAGAGCCTAAAAAGGACAAAAGA | : 1120 |
| SARS-CoV2 - Australia        | ATTTTGCTGAATAAGCATATTGACGCATACAAAACATTTCCACCAACAGAGCCTAAAAAGGACAAAAGA | : 1120 |
| SARS-CoV2 - Taiwan           | ATTTTGCTGAATAAGCATATTGACGCATACAAAACATTTCCACCAACAGAGCCTAAAAAGGACAAAAGA | : 1120 |
| SARS-CoV2 - Italy            | ATTTTGCTGAATAAGCATATTGACGCATACAAAACATTTCCACCAACAGAGCCTAAAAAGGACAAAAGA | : 1120 |
| SARS-CoV2 - India            | ATTTTGCTGAATAAGCATATTGACGCATACAAAACATTTCCACCAACAGAGCCTAAAAAGGACAAAAGA | : 1120 |
| SARS-CoV2 - Sweden           | ATTTTGCTGAATAAGCATATTGACGCATACAAAACATTTCCACCAACAGAGCCTAAAAAGGACAAAAGA | : 1120 |
| SARS-CoV2 - Spain            | ATTTTGCTGAATAAGCATATTGACGCATACAAAACATTTCCACCAACAGAGCCTAAAAAGGACAAAAGA | : 1120 |
| SARS-CoV2 - Brazil           | ATTTTGCTGAATAAGCATATTGACGCATACAAAACATTTCCACCAACAGAGCCTAAAAAGGACAAAAGA | : 1120 |
| SARS-CoV2 - Pakistan         | ATTTTGCTGAATAAGCATATTGACGCATACAAAACATTTCCACCAACAGAGCCTAAAAAGGACAAAAGA | : 1120 |



B

TGGGGVTTACRGTTAACCT

SARS-CoV2 - China/Wuhan-Hu-1 : TCTATAATCCGTTTATGATTGATGTTCAACAATGGGGTTTTACAGTAACCTACAAAGCAACCATGATCT : 18550  
 SARS-CoV2 - Japan : TCTATAATCCGTTTATGATTGATGTTCAACAATGGGGTTTTACAGTAACCTACAAAGCAACCATGATCT : 18550  
 SARS-CoV2 - South Korea : TCTATAATCCGTTTATGATTGATGTTCAACAATGGGGTTTTACAGTAACCTACAAAGCAACCATGATCT : 18550  
 SARS-CoV2 - Nepal : TCTATAATCCGTTTATGATTGATGTTCAACAATGGGGTTTTACAGTAACCTACAAAGCAACCATGATCT : 18550  
 SARS-CoV2 - USA : TCTATAATCCGTTTATGATTGATGTTCAACAATGGGGTTTTACAGTAACCTACAAAGCAACCATGATCT : 18550  
 SARS-CoV2 - Viet Nam : TCTATAATCCGTTTATGATTGATGTTCAACAATGGGGTTTTACAGTAACCTACAAAGCAACCATGATCT : 18550  
 SARS-CoV2 - Australia : TCTATAATCCGTTTATGATTGATGTTCAACAATGGGGTTTTACAGTAACCTACAAAGCAACCATGATCT : 18550  
 SARS-CoV2 - Taiwan : TCTATAATCCGTTTATGATTGATGTTCAACAATGGGGTTTTACAGTAACCTACAAAGCAACCATGATCT : 18550  
 SARS-CoV2 - Italy : TCTATAATCCGTTTATGATTGATGTTCAACAATGGGGTTTTACAGTAACCTACAAAGCAACCATGATCT : 18550  
 SARS-CoV2 - India : TCTATAATCCGTTTATGATTGATGTTCAACAATGGGGTTTTACAGTAACCTACAAAGCAACCATGATCT : 18550  
 SARS-CoV2 - Sweden : TCTATAATCCGTTTATGATTGATGTTCAACAATGGGGTTTTACAGTAACCTACAAAGCAACCATGATCT : 18550  
 SARS-CoV2 - Spain : TCTATAATCCGTTTATGATTGATGTTCAACAATGGGGTTTTACAGTAACCTACAAAGCAACCATGATCT : 18550  
 SARS-CoV2 - Brazil : TCTATAATCCGTTTATGATTGATGTTCAACAATGGGGTTTTACAGTAACCTACAAAGCAACCATGATCT : 18550  
 SARS-CoV2 - Pakistan : TCTATAATCCGTTTATGATTGATGTTCAACAATGGGGTTTTACAGTAACCTACAAAGCAACCATGATCT : 18550

TAGTTGTGATGCWATCATGACTAG

SARS-CoV2 - China/Wuhan-Hu-1 : GTATTGTCAAGTCCATGGTAATGCACATGTAGCTAGTTGTGATGCAATCATGACTAGGTGTCTAGCTGTC : 18620  
 SARS-CoV2 - Japan : GTATTGTCAAGTCCATGGTAATGCACATGTAGCTAGTTGTGATGCAATCATGACTAGGTGTCTAGCTGTC : 18620  
 SARS-CoV2 - South Korea : GTATTGTCAAGTCCATGGTAATGCACATGTAGCTAGTTGTGATGCAATCATGACTAGGTGTCTAGCTGTC : 18620  
 SARS-CoV2 - Nepal : GTATTGTCAAGTCCATGGTAATGCACATGTAGCTAGTTGTGATGCAATCATGACTAGGTGTCTAGCTGTC : 18620  
 SARS-CoV2 - USA : GTATTGTCAAGTCCATGGTAATGCACATGTAGCTAGTTGTGATGCAATCATGACTAGGTGTCTAGCTGTC : 18620  
 SARS-CoV2 - Viet Nam : GTATTGTCAAGTCCATGGTAATGCACATGTAGCTAGTTGTGATGCAATCATGACTAGGTGTCTAGCTGTC : 18620  
 SARS-CoV2 - Australia : GTATTGTCAAGTCCATGGTAATGCACATGTAGCTAGTTGTGATGCAATCATGACTAGGTGTCTAGCTGTC : 18620  
 SARS-CoV2 - Taiwan : GTATTGTCAAGTCCATGGTAATGCACATGTAGCTAGTTGTGATGCAATCATGACTAGGTGTCTAGCTGTC : 18620  
 SARS-CoV2 - Italy : GTATTGTCAAGTCCATGGTAATGCACATGTAGCTAGTTGTGATGCAATCATGACTAGGTGTCTAGCTGTC : 18620  
 SARS-CoV2 - India : GTATTGTCAAGTCCATGGTAATGCACATGTAGCTAGTTGTGATGCAATCATGACTAGGTGTCTAGCTGTC : 18620  
 SARS-CoV2 - Sweden : GTATTGTCAAGTCCATGGTAATGCACATGTAGCTAGTTGTGATGCAATCATGACTAGGTGTCTAGCTGTC : 18620  
 SARS-CoV2 - Spain : GTATTGTCAAGTCCATGGTAATGCACATGTAGCTAGTTGTGATGCAATCATGACTAGGTGTCTAGCTGTC : 18620  
 SARS-CoV2 - Brazil : GTATTGTCAAGTCCATGGTAATGCACATGTAGCTAGTTGTGATGCAATCATGACTAGGTGTCTAGCTGTC : 18620  
 SARS-CoV2 - Pakistan : GTATTGTCAAGTCCATGGTAATGCACATGTAGCTAGTTGTGATGCAATCATGACTAGGTGTCTAGCTGTC : 18620

AACRCGTTAACAAAGCACT

SARS-CoV2 - China/Wuhan-Hu-1 : CACGAGTGCCTTTGTTAAGCGTGTGACTGGACTATTGAATATCCTATAATGGTGATGAAGTGAAGATTA : 18690  
 SARS-CoV2 - Japan : CACGAGTGCCTTTGTTAAGCGTGTGACTGGACTATTGAATATCCTATAATGGTGATGAAGTGAAGATTA : 18690  
 SARS-CoV2 - South Korea : CACGAGTGCCTTTGTTAAGCGTGTGACTGGACTATTGAATATCCTATAATGGTGATGAAGTGAAGATTA : 18690  
 SARS-CoV2 - Nepal : CACGAGTGCCTTTGTTAAGCGTGTGACTGGACTATTGAATATCCTATAATGGTGATGAAGTGAAGATTA : 18690  
 SARS-CoV2 - USA : CACGAGTGCCTTTGTTAAGCGTGTGACTGGACTATTGAATATCCTATAATGGTGATGAAGTGAAGATTA : 18690  
 SARS-CoV2 - Viet Nam : CACGAGTGCCTTTGTTAAGCGTGTGACTGGACTATTGAATATCCTATAATGGTGATGAAGTGAAGATTA : 18690  
 SARS-CoV2 - Australia : CACGAGTGCCTTTGTTAAGCGTGTGACTGGACTATTGAATATCCTATAATGGTGATGAAGTGAAGATTA : 18690  
 SARS-CoV2 - Taiwan : CACGAGTGCCTTTGTTAAGCGTGTGACTGGACTATTGAATATCCTATAATGGTGATGAAGTGAAGATTA : 18690  
 SARS-CoV2 - Italy : CACGAGTGCCTTTGTTAAGCGTGTGACTGGACTATTGAATATCCTATAATGGTGATGAAGTGAAGATTA : 18690  
 SARS-CoV2 - India : CACGAGTGCCTTTGTTAAGCGTGTGACTGGACTATTGAATATCCTATAATGGTGATGAAGTGAAGATTA : 18690  
 SARS-CoV2 - Sweden : CACGAGTGCCTTTGTTAAGCGTGTGACTGGACTATTGAATATCCTATAATGGTGATGAAGTGAAGATTA : 18690  
 SARS-CoV2 - Spain : CACGAGTGCCTTTGTTAAGCGTGTGACTGGACTATTGAATATCCTATAATGGTGATGAAGTGAAGATTA : 18690  
 SARS-CoV2 - Brazil : CACGAGTGCCTTTGTTAAGCGTGTGACTGGACTATTGAATATCCTATAATGGTGATGAAGTGAAGATTA : 18690  
 SARS-CoV2 - Pakistan : CACGAGTGCCTTTGTTAAGCGTGTGACTGGACTATTGAATATCCTATAATGGTGATGAAGTGAAGATTA : 18690

SARS-CoV2 - China/Wuhan-Hu-1 : ATGCGGCTGTAGAAAGGTTCAACACATGGTTGTTAAAGCTGCATTATTAGCAGACAAATCCCAGTTCT : 18760  
 SARS-CoV2 - Japan : ATGCGGCTGTAGAAAGGTTCAACACATGGTTGTTAAAGCTGCATTATTAGCAGACAAATCCCAGTTCT : 18760  
 SARS-CoV2 - South Korea : ATGCGGCTGTAGAAAGGTTCAACACATGGTTGTTAAAGCTGCATTATTAGCAGACAAATCCCAGTTCT : 18760  
 SARS-CoV2 - Nepal : ATGCGGCTGTAGAAAGGTTCAACACATGGTTGTTAAAGCTGCATTATTAGCAGACAAATCCCAGTTCT : 18760  
 SARS-CoV2 - USA : ATGCGGCTGTAGAAAGGTTCAACACATGGTTGTTAAAGCTGCATTATTAGCAGACAAATCCCAGTTCT : 18760  
 SARS-CoV2 - Viet Nam : ATGCGGCTGTAGAAAGGTTCAACACATGGTTGTTAAAGCTGCATTATTAGCAGACAAATCCCAGTTCT : 18760  
 SARS-CoV2 - Australia : ATGCGGCTGTAGAAAGGTTCAACACATGGTTGTTAAAGCTGCATTATTAGCAGACAAATCCCAGTTCT : 18760  
 SARS-CoV2 - Taiwan : ATGCGGCTGTAGAAAGGTTCAACACATGGTTGTTAAAGCTGCATTATTAGCAGACAAATCCCAGTTCT : 18760  
 SARS-CoV2 - Italy : ATGCGGCTGTAGAAAGGTTCAACACATGGTTGTTAAAGCTGCATTATTAGCAGACAAATCCCAGTTCT : 18760  
 SARS-CoV2 - India : ATGCGGCTGTAGAAAGGTTCAACACATGGTTGTTAAAGCTGCATTATTAGCAGACAAATCCCAGTTCT : 18760  
 SARS-CoV2 - Sweden : ATGCGGCTGTAGAAAGGTTCAACACATGGTTGTTAAAGCTGCATTATTAGCAGACAAATCCCAGTTCT : 18760  
 SARS-CoV2 - Spain : ATGCGGCTGTAGAAAGGTTCAACACATGGTTGTTAAAGCTGCATTATTAGCAGACAAATCCCAGTTCT : 18760  
 SARS-CoV2 - Brazil : ATGCGGCTGTAGAAAGGTTCAACACATGGTTGTTAAAGCTGCATTATTAGCAGACAAATCCCAGTTCT : 18760  
 SARS-CoV2 - Pakistan : ATGCGGCTGTAGAAAGGTTCAACACATGGTTGTTAAAGCTGCATTATTAGCAGACAAATCCCAGTTCT : 18760

**Suppl. Fig. 5.** Partial sequence alignment of the new coronavirus (SARS-CoV2) N gene deposited at the GenBank. **(A)** Partial alignment of the N gene. **(B)** Partial alignment of the NSP14 gene. The colors blue, red and green of the lines correspond to the forward and reverse primers and the probe, respectively, as recommended by the National Institute of Infectious Diseases, Department of Virology III/Japan.

|                              | <u>AAATTTGGGGACCAGGAAC</u>                                                    |        |
|------------------------------|-------------------------------------------------------------------------------|--------|
| SARS-CoV2 - China/Wuhan-Hu-1 | CAAACCCAAAGGAAATTTGGGGACCAGGAACATAACAGACAAGGAACTGATTACAAACATTTGGCCGCAAA       | : 910  |
| SARS-CoV2 - Japan            | CAAACCCAAAGGAAATTTGGGGACCAGGAACATAACAGACAAGGAACTGATTACAAACATTTGGCCGCAAA       | : 910  |
| SARS-CoV2 - South Korea      | CAAACCCAAAGGAAATTTGGGGACCAGGAACATAACAGACAAGGAACTGATTACAAACATTTGGCCGCAAA       | : 910  |
| SARS-CoV2 - Nepal            | CAAACCCAAAGGAAATTTGGGGACCAGGAACATAACAGACAAGGAACTGATTACAAACATTTGGCCGCAAA       | : 910  |
| SARS-CoV2 - USA              | CAAACCCAAAGGAAATTTGGGGACCAGGAACATAACAGACAAGGAACTGATTACAAACATTTGGCCGCAAA       | : 910  |
| SARS-CoV2 - Viet Nam         | CAAACCCAAAGGAAATTTGGGGACCAGGAACATAACAGACAAGGAACTGATTACAAACATTTGGCCGCAAA       | : 910  |
| SARS-CoV2 - Australia        | CAAACCCAAAGGAAATTTGGGGACCAGGAACATAACAGACAAGGAACTGATTACAAACATTTGGCCGCAAA       | : 910  |
| SARS-CoV2 - Taiwan           | CAAACCCAAAGGAAATTTGGGGACCAGGAACATAACAGACAAGGAACTGATTACAAACATTTGGCCGCAAA       | : 910  |
| SARS-CoV2 - Italy            | CAAACCCAAAGGAAATTTGGGGACCAGGAACATAACAGACAAGGAACTGATTACAAACATTTGGCCGCAAA       | : 910  |
| SARS-CoV2 - India            | CAAACCCAAAGGAAATTTGGGGACCAGGAACATAACAGACAAGGAACTGATTACAAACATTTGGCCGCAAA       | : 910  |
| SARS-CoV2 - Sweden           | CAAACCCAAAGGAAATTTGGGGACCAGGAACATAACAGACAAGGAACTGATTACAAACATTTGGCCGCAAA       | : 910  |
| SARS-CoV2 - Spain            | CAAACCCAAAGGAAATTTGGGGACCAGGAACATAACAGACAAGGAACTGATTACAAACATTTGGCCGCAAA       | : 910  |
| SARS-CoV2 - Brazil           | CAAACCCAAAGGAAATTTGGGGACCAGGAACATAACAGACAAGGAACTGATTACAAACATTTGGCCGCAAA       | : 910  |
| SARS-CoV2 - Pakistan         | CAAACCCAAAGGAAATTTGGGGACCAGGAACATAACAGACAAGGAACTGATTACAAACATTTGGCCGCAAA       | : 910  |
| <br>                         |                                                                               |        |
|                              | <u>ATGTCGCGCATTTGGCATGGA</u>                                                  |        |
| SARS-CoV2 - China/Wuhan-Hu-1 | TTGCACAATTTGCCCCACGGCTTCAGCGTTCCTTCGGAATGTCGCGCATTTGGCATGGAAGTCACACCTTC       | : 980  |
| SARS-CoV2 - Japan            | TTGCACAATTTGCCCCACGGCTTCAGCGTTCCTTCGGAATGTCGCGCATTTGGCATGGAAGTCACACCTTC       | : 980  |
| SARS-CoV2 - South Korea      | TTGCACAATTTGCCCCACGGCTTCAGCGTTCCTTCGGAATGTCGCGCATTTGGCATGGAAGTCACACCTTC       | : 980  |
| SARS-CoV2 - Nepal            | TTGCACAATTTGCCCCACGGCTTCAGCGTTCCTTCGGAATGTCGCGCATTTGGCATGGAAGTCACACCTTC       | : 980  |
| SARS-CoV2 - USA              | TTGCACAATTTGCCCCACGGCTTCAGCGTTCCTTCGGAATGTCGCGCATTTGGCATGGAAGTCACACCTTC       | : 980  |
| SARS-CoV2 - Viet Nam         | TTGCACAATTTGCCCCACGGCTTCAGCGTTCCTTCGGAATGTCGCGCATTTGGCATGGAAGTCACACCTTC       | : 980  |
| SARS-CoV2 - Australia        | TTGCACAATTTGCCCCACGGCTTCAGCGTTCCTTCGGAATGTCGCGCATTTGGCATGGAAGTCACACCTTC       | : 980  |
| SARS-CoV2 - Taiwan           | TTGCACAATTTGCCCCACGGCTTCAGCGTTCCTTCGGAATGTCGCGCATTTGGCATGGAAGTCACACCTTC       | : 980  |
| SARS-CoV2 - Italy            | TTGCACAATTTGCCCCACGGCTTCAGCGTTCCTTCGGAATGTCGCGCATTTGGCATGGAAGTCACACCTTC       | : 980  |
| SARS-CoV2 - India            | TTGCACAATTTGCCCCACGGCTTCAGCGTTCCTTCGGAATGTCGCGCATTTGGCATGGAAGTCACACCTTC       | : 980  |
| SARS-CoV2 - Sweden           | TTGCACAATTTGCCCCACGGCTTCAGCGTTCCTTCGGAATGTCGCGCATTTGGCATGGAAGTCACACCTTC       | : 980  |
| SARS-CoV2 - Spain            | TTGCACAATTTGCCCCACGGCTTCAGCGTTCCTTCGGAATGTCGCGCATTTGGCATGGAAGTCACACCTTC       | : 980  |
| SARS-CoV2 - Brazil           | TTGCACAATTTGCCCCACGGCTTCAGCGTTCCTTCGGAATGTCGCGCATTTGGCATGGAAGTCACACCTTC       | : 980  |
| SARS-CoV2 - Pakistan         | TTGCACAATTTGCCCCACGGCTTCAGCGTTCCTTCGGAATGTCGCGCATTTGGCATGGAAGTCACACCTTC       | : 980  |
| <br>                         |                                                                               |        |
|                              | <u>TGGCAGCTGTGTAGGTCAAC</u>                                                   |        |
| SARS-CoV2 - China/Wuhan-Hu-1 | GGGAACGTGGTTGACCTACACAGGTGCCATCAAATTTGGATGACAAAGATCCAAATTTCAAAGATCAAGTC       | : 1050 |
| SARS-CoV2 - Japan            | GGGAACGTGGTTGACCTACACAGGTGCCATCAAATTTGGATGACAAAGATCCAAATTTCAAAGATCAAGTC       | : 1050 |
| SARS-CoV2 - South Korea      | GGGAACGTGGTTGACCTACACAGGTGCCATCAAATTTGGATGACAAAGATCCAAATTTCAAAGATCAAGTC       | : 1050 |
| SARS-CoV2 - Nepal            | GGGAACGTGGTTGACCTACACAGGTGCCATCAAATTTGGATGACAAAGATCCAAATTTCAAAGATCAAGTC       | : 1050 |
| SARS-CoV2 - USA              | GGGAACGTGGTTGACCTACACAGGTGCCATCAAATTTGGATGACAAAGATCCAAATTTCAAAGATCAAGTC       | : 1050 |
| SARS-CoV2 - Viet Nam         | GGGAACGTGGTTGACCTACACAGGTGCCATCAAATTTGGATGACAAAGATCCAAATTTCAAAGATCAAGTC       | : 1050 |
| SARS-CoV2 - Australia        | GGGAACGTGGTTGACCTACACAGGTGCCATCAAATTTGGATGACAAAGATCCAAATTTCAAAGATCAAGTC       | : 1050 |
| SARS-CoV2 - Taiwan           | GGGAACGTGGTTGACCTACACAGGTGCCATCAAATTTGGATGACAAAGATCCAAATTTCAAAGATCAAGTC       | : 1050 |
| SARS-CoV2 - Italy            | GGGAACGTGGTTGACCTACACAGGTGCCATCAAATTTGGATGACAAAGATCCAAATTTCAAAGATCAAGTC       | : 1050 |
| SARS-CoV2 - India            | GGGAACGTGGTTGACCTACACAGGTGCCATCAAATTTGGATGACAAAGATCCAAATTTCAAAGATCAAGTC       | : 1050 |
| SARS-CoV2 - Sweden           | GGGAACGTGGTTGACCTACACAGGTGCCATCAAATTTGGATGACAAAGATCCAAATTTCAAAGATCAAGTC       | : 1050 |
| SARS-CoV2 - Spain            | GGGAACGTGGTTGACCTACACAGGTGCCATCAAATTTGGATGACAAAGATCCAAATTTCAAAGATCAAGTC       | : 1050 |
| SARS-CoV2 - Brazil           | GGGAACGTGGTTGACCTACACAGGTGCCATCAAATTTGGATGACAAAGATCCAAATTTCAAAGATCAAGTC       | : 1050 |
| SARS-CoV2 - Pakistan         | GGGAACGTGGTTGACCTACACAGGTGCCATCAAATTTGGATGACAAAGATCCAAATTTCAAAGATCAAGTC       | : 1050 |
| <br>                         |                                                                               |        |
|                              | <u>ATTTTGCTGAATAAGCATATTGACGCATACAAAACATTTCCACCAACAGAGCCTAAAAAGGACAAAAAGA</u> |        |
| SARS-CoV2 - China/Wuhan-Hu-1 | ATTTTGCTGAATAAGCATATTGACGCATACAAAACATTTCCACCAACAGAGCCTAAAAAGGACAAAAAGA        | : 1120 |
| SARS-CoV2 - Japan            | ATTTTGCTGAATAAGCATATTGACGCATACAAAACATTTCCACCAACAGAGCCTAAAAAGGACAAAAAGA        | : 1120 |
| SARS-CoV2 - South Korea      | ATTTTGCTGAATAAGCATATTGACGCATACAAAACATTTCCACCAACAGAGCCTAAAAAGGACAAAAAGA        | : 1120 |
| SARS-CoV2 - Nepal            | ATTTTGCTGAATAAGCATATTGACGCATACAAAACATTTCCACCAACAGAGCCTAAAAAGGACAAAAAGA        | : 1120 |
| SARS-CoV2 - USA              | ATTTTGCTGAATAAGCATATTGACGCATACAAAACATTTCCACCAACAGAGCCTAAAAAGGACAAAAAGA        | : 1120 |
| SARS-CoV2 - Viet Nam         | ATTTTGCTGAATAAGCATATTGACGCATACAAAACATTTCCACCAACAGAGCCTAAAAAGGACAAAAAGA        | : 1120 |
| SARS-CoV2 - Australia        | ATTTTGCTGAATAAGCATATTGACGCATACAAAACATTTCCACCAACAGAGCCTAAAAAGGACAAAAAGA        | : 1120 |
| SARS-CoV2 - Taiwan           | ATTTTGCTGAATAAGCATATTGACGCATACAAAACATTTCCACCAACAGAGCCTAAAAAGGACAAAAAGA        | : 1120 |
| SARS-CoV2 - Italy            | ATTTTGCTGAATAAGCATATTGACGCATACAAAACATTTCCACCAACAGAGCCTAAAAAGGACAAAAAGA        | : 1120 |
| SARS-CoV2 - India            | ATTTTGCTGAATAAGCATATTGACGCATACAAAACATTTCCACCAACAGAGCCTAAAAAGGACAAAAAGA        | : 1120 |
| SARS-CoV2 - Sweden           | ATTTTGCTGAATAAGCATATTGACGCATACAAAACATTTCCACCAACAGAGCCTAAAAAGGACAAAAAGA        | : 1120 |
| SARS-CoV2 - Spain            | ATTTTGCTGAATAAGCATATTGACGCATACAAAACATTTCCACCAACAGAGCCTAAAAAGGACAAAAAGA        | : 1120 |
| SARS-CoV2 - Brazil           | ATTTTGCTGAATAAGCATATTGACGCATACAAAACATTTCCACCAACAGAGCCTAAAAAGGACAAAAAGA        | : 1120 |
| SARS-CoV2 - Pakistan         | ATTTTGCTGAATAAGCATATTGACGCATACAAAACATTTCCACCAACAGAGCCTAAAAAGGACAAAAAGA        | : 1120 |

**Suppl. Fig. 6.** Partial sequence alignment of the new coronavirus (SARS-CoV2) N gene deposited at the GenBank. **(A)** Partial alignment of the N gene. **(B)** Partial alignment of the NSP14 gene. The colors blue, red and green of the lines correspond to the forward and reverse primers and the probe, respectively, as recommended by the National Institute of Health/Thailand.

|                              |   |                                                                           |       |
|------------------------------|---|---------------------------------------------------------------------------|-------|
|                              |   | <b>CGTTTGGTGACCCTCAGAT CAA</b>                                            |       |
| SARS-CoV2 - China/Wuhan-Hu-1 | : | ATGCTGATAATGGACCCCAAAATCAGCGAAATGCACCCCGCATTACGTTTGGTGGACCCCTCAGATTCAA    | : 70  |
| SARS-CoV2 - Japan            | : | ATGCTGATAATGGACCCCAAAATCAGCGAAATGCACCCCGCATTACGTTTGGTGGACCCCTCAGATTCAA    | : 70  |
| SARS-CoV2 - South Korea      | : | ATGCTGATAATGGACCCCAAAATCAGCGAAATGCACCCCGCATTACGTTTGGTGGACCCCTCAGATTCAA    | : 70  |
| SARS-CoV2 - Nepal            | : | ATGCTGATAATGGACCCCAAAATCAGCGAAATGCACCCCGCATTACGTTTGGTGGACCCCTCAGATTCAA    | : 70  |
| SARS-CoV2 - USA              | : | ATGCTGATAATGGACCCCAAAATCAGCGAAATGCACCCCGCATTACGTTTGGTGGACCCCTCAGATTCAA    | : 70  |
| SARS-CoV2 - Viet Nam         | : | ATGCTGATAATGGACCCCAAAATCAGCGAAATGCACCCCGCATTACGTTTGGTGGACCCCTCAGATTCAA    | : 70  |
| SARS-CoV2 - Australia        | : | ATGCTGATAATGGACCCCAAAATCAGCGAAATGCACCCCGCATTACGTTTGGTGGACCCCTCAGATTCAA    | : 70  |
| SARS-CoV2 - Taiwan           | : | ATGCTGATAATGGACCCCAAAATCAGCGAAATGCACCCCGCATTACGTTTGGTGGACCCCTCAGATTCAA    | : 70  |
| SARS-CoV2 - Italy            | : | ATGCTGATAATGGACCCCAAAATCAGCGAAATGCACCCCGCATTACGTTTGGTGGACCCCTCAGATTCAA    | : 70  |
| SARS-CoV2 - India            | : | ATGCTGATAATGGACCCCAAAATCAGCGAAATGCACCCCGCATTACGTTTGGTGGACCCCTCAGATTCAA    | : 70  |
| SARS-CoV2 - Sweden           | : | ATGCTGATAATGGACCCCAAAATCAGCGAAATGCACCCCGCATTACGTTTGGTGGACCCCTCAGATTCAA    | : 70  |
| SARS-CoV2 - Spain            | : | ATGCTGATAATGGACCCCAAAATCAGCGAAATGCACCCCGCATTACGTTTGGTGGACCCCTCAGATTCAA    | : 70  |
| SARS-CoV2 - Brazil           | : | ATGCTGATAATGGACCCCAAAATCAGCGAAATGCACCCCGCATTACGTTTGGTGGACCCCTCAGATTCAA    | : 70  |
| SARS-CoV2 - Pakistan         | : | ATGCTGATAATGGACCCCAAAATCAGCGAAATGCACCCCGCATTACGTTTGGTGGACCCCTCAGATTCAA    | : 70  |
|                              |   |                                                                           |       |
|                              |   | <b>CTGGCAGTAACCA CCCCACTGCGTTCTCCATT</b>                                  |       |
| SARS-CoV2 - China/Wuhan-Hu-1 | : | CTGGCAGTAACCCAGAAATGGAGAACCGAGTGGGGCGCGATCAAAAACAACGTCGGCCCCAAGGTTTACCCAA | : 140 |
| SARS-CoV2 - Japan            | : | CTGGCAGTAACCCAGAAATGGAGAACCGAGTGGGGCGCGATCAAAAACAACGTCGGCCCCAAGGTTTACCCAA | : 140 |
| SARS-CoV2 - South Korea      | : | CTGGCAGTAACCCAGAAATGGAGAACCGAGTGGGGCGCGATCAAAAACAACGTCGGCCCCAAGGTTTACCCAA | : 140 |
| SARS-CoV2 - Nepal            | : | CTGGCAGTAACCCAGAAATGGAGAACCGAGTGGGGCGCGATCAAAAACAACGTCGGCCCCAAGGTTTACCCAA | : 140 |
| SARS-CoV2 - USA              | : | CTGGCAGTAACCCAGAAATGGAGAACCGAGTGGGGCGCGATCAAAAACAACGTCGGCCCCAAGGTTTACCCAA | : 140 |
| SARS-CoV2 - Viet Nam         | : | CTGGCAGTAACCCAGAAATGGAGAACCGAGTGGGGCGCGATCAAAAACAACGTCGGCCCCAAGGTTTACCCAA | : 140 |
| SARS-CoV2 - Australia        | : | CTGGCAGTAACCCAGAAATGGAGAACCGAGTGGGGCGCGATCAAAAACAACGTCGGCCCCAAGGTTTACCCAA | : 140 |
| SARS-CoV2 - Taiwan           | : | CTGGCAGTAACCCAGAAATGGAGAACCGAGTGGGGCGCGATCAAAAACAACGTCGGCCCCAAGGTTTACCCAA | : 140 |
| SARS-CoV2 - Italy            | : | CTGGCAGTAACCCAGAAATGGAGAACCGAGTGGGGCGCGATCAAAAACAACGTCGGCCCCAAGGTTTACCCAA | : 140 |
| SARS-CoV2 - India            | : | CTGGCAGTAACCCAGAAATGGAGAACCGAGTGGGGCGCGATCAAAAACAACGTCGGCCCCAAGGTTTACCCAA | : 140 |
| SARS-CoV2 - Sweden           | : | CTGGCAGTAACCCAGAAATGGAGAACCGAGTGGGGCGCGATCAAAAACAACGTCGGCCCCAAGGTTTACCCAA | : 140 |
| SARS-CoV2 - Spain            | : | CTGGCAGTAACCCAGAAATGGAGAACCGAGTGGGGCGCGATCAAAAACAACGTCGGCCCCAAGGTTTACCCAA | : 140 |
| SARS-CoV2 - Brazil           | : | CTGGCAGTAACCCAGAAATGGAGAACCGAGTGGGGCGCGATCAAAAACAACGTCGGCCCCAAGGTTTACCCAA | : 140 |
| SARS-CoV2 - Pakistan         | : | CTGGCAGTAACCCAGAAATGGAGAACCGAGTGGGGCGCGATCAAAAACAACGTCGGCCCCAAGGTTTACCCAA | : 140 |
|                              |   |                                                                           |       |
| SARS-CoV2 - China/Wuhan-Hu-1 | : | TAATACTGCGTCTTGGTTCACCGCTCTCACTCAACATGGCAAGGAAGACCTTAAATTCCTCGAGGACAA     | : 210 |
| SARS-CoV2 - Japan            | : | TAATACTGCGTCTTGGTTCACCGCTCTCACTCAACATGGCAAGGAAGACCTTAAATTCCTCGAGGACAA     | : 210 |
| SARS-CoV2 - South Korea      | : | TAATACTGCGTCTTGGTTCACCGCTCTCACTCAACATGGCAAGGAAGACCTTAAATTCCTCGAGGACAA     | : 210 |
| SARS-CoV2 - Nepal            | : | TAATACTGCGTCTTGGTTCACCGCTCTCACTCAACATGGCAAGGAAGACCTTAAATTCCTCGAGGACAA     | : 210 |
| SARS-CoV2 - USA              | : | TAATACTGCGTCTTGGTTCACCGCTCTCACTCAACATGGCAAGGAAGACCTTAAATTCCTCGAGGACAA     | : 210 |
| SARS-CoV2 - Viet Nam         | : | TAATACTGCGTCTTGGTTCACCGCTCTCACTCAACATGGCAAGGAAGACCTTAAATTCCTCGAGGACAA     | : 210 |
| SARS-CoV2 - Australia        | : | TAATACTGCGTCTTGGTTCACCGCTCTCACTCAACATGGCAAGGAAGACCTTAAATTCCTCGAGGACAA     | : 210 |
| SARS-CoV2 - Taiwan           | : | TAATACTGCGTCTTGGTTCACCGCTCTCACTCAACATGGCAAGGAAGACCTTAAATTCCTCGAGGACAA     | : 210 |
| SARS-CoV2 - Italy            | : | TAATACTGCGTCTTGGTTCACCGCTCTCACTCAACATGGCAAGGAAGACCTTAAATTCCTCGAGGACAA     | : 210 |
| SARS-CoV2 - India            | : | TAATACTGCGTCTTGGTTCACCGCTCTCACTCAACATGGCAAGGAAGACCTTAAATTCCTCGAGGACAA     | : 210 |
| SARS-CoV2 - Sweden           | : | TAATACTGCGTCTTGGTTCACCGCTCTCACTCAACATGGCAAGGAAGACCTTAAATTCCTCGAGGACAA     | : 210 |
| SARS-CoV2 - Spain            | : | TAATACTGCGTCTTGGTTCACCGCTCTCACTCAACATGGCAAGGAAGACCTTAAATTCCTCGAGGACAA     | : 210 |
| SARS-CoV2 - Brazil           | : | TAATACTGCGTCTTGGTTCACCGCTCTCACTCAACATGGCAAGGAAGACCTTAAATTCCTCGAGGACAA     | : 210 |
| SARS-CoV2 - Pakistan         | : | TAATACTGCGTCTTGGTTCACCGCTCTCACTCAACATGGCAAGGAAGACCTTAAATTCCTCGAGGACAA     | : 210 |
|                              |   |                                                                           |       |
| SARS-CoV2 - China/Wuhan-Hu-1 | : | GGCGTTCCAATTAACACCAATAGCAGTCCAGATGACCAAAATGGCTACTACCGAAGAGCTACCAGACGAA    | : 280 |
| SARS-CoV2 - Japan            | : | GGCGTTCCAATTAACACCAATAGCAGTCCAGATGACCAAAATGGCTACTACCGAAGAGCTACCAGACGAA    | : 280 |
| SARS-CoV2 - South Korea      | : | GGCGTTCCAATTAACACCAATAGCAGTCCAGATGACCAAAATGGCTACTACCGAAGAGCTACCAGACGAA    | : 280 |
| SARS-CoV2 - Nepal            | : | GGCGTTCCAATTAACACCAATAGCAGTCCAGATGACCAAAATGGCTACTACCGAAGAGCTACCAGACGAA    | : 280 |
| SARS-CoV2 - USA              | : | GGCGTTCCAATTAACACCAATAGCAGTCCAGATGACCAAAATGGCTACTACCGAAGAGCTACCAGACGAA    | : 280 |
| SARS-CoV2 - Viet Nam         | : | GGCGTTCCAATTAACACCAATAGCAGTCCAGATGACCAAAATGGCTACTACCGAAGAGCTACCAGACGAA    | : 280 |
| SARS-CoV2 - Australia        | : | GGCGTTCCAATTAACACCAATAGCAGTCCAGATGACCAAAATGGCTACTACCGAAGAGCTACCAGACGAA    | : 280 |
| SARS-CoV2 - Taiwan           | : | GGCGTTCCAATTAACACCAATAGCAGTCCAGATGACCAAAATGGCTACTACCGAAGAGCTACCAGACGAA    | : 280 |
| SARS-CoV2 - Italy            | : | GGCGTTCCAATTAACACCAATAGCAGTCCAGATGACCAAAATGGCTACTACCGAAGAGCTACCAGACGAA    | : 280 |
| SARS-CoV2 - India            | : | GGCGTTCCAATTAACACCAATAGCAGTCCAGATGACCAAAATGGCTACTACCGAAGAGCTACCAGACGAA    | : 280 |
| SARS-CoV2 - Sweden           | : | GGCGTTCCAATTAACACCAATAGCAGTCCAGATGACCAAAATGGCTACTACCGAAGAGCTACCAGACGAA    | : 280 |
| SARS-CoV2 - Spain            | : | GGCGTTCCAATTAACACCAATAGCAGTCCAGATGACCAAAATGGCTACTACCGAAGAGCTACCAGACGAA    | : 280 |
| SARS-CoV2 - Brazil           | : | GGCGTTCCAATTAACACCAATAGCAGTCCAGATGACCAAAATGGCTACTACCGAAGAGCTACCAGACGAA    | : 280 |
| SARS-CoV2 - Pakistan         | : | GGCGTTCCAATTAACACCAATAGCAGTCCAGATGACCAAAATGGCTACTACCGAAGAGCTACCAGACGAA    | : 280 |

**Suppl. Fig. 7.** Partial sequence alignment of the new coronavirus (SARS-CoV2) N gene deposited at the GenBank. **(A)** Partial alignment of the N gene. **(B)** Partial alignment of the NSP14 gene. The colors blue, red and green of the lines correspond to the forward and reverse primers and the probe, respectively, as recommended by the Centers for Disease Control and Prevention (CDC)/USA.

|                              | <b>GACCCCAAAATGACGAAAT ACCCCGCATTACGTTTGGTGACC TCTGGTTAC</b>                |       |
|------------------------------|-----------------------------------------------------------------------------|-------|
| SARS-CoV2 - China/Wuhan-Hu-1 | ATGCTGATAATGGACCCCAAAATGACGAAATGCCCCGCATTACGTTTGGTGACCCTCAGATTCAA           | : 70  |
| SARS-CoV2 - Japan            | ATGCTGATAATGGACCCCAAAATGACGAAATGCCCCGCATTACGTTTGGTGACCCTCAGATTCAA           | : 70  |
| SARS-CoV2 - South Korea      | ATGCTGATAATGGACCCCAAAATGACGAAATGCCCCGCATTACGTTTGGTGACCCTCAGATTCAA           | : 70  |
| SARS-CoV2 - Nepal            | ATGCTGATAATGGACCCCAAAATGACGAAATGCCCCGCATTACGTTTGGTGACCCTCAGATTCAA           | : 70  |
| SARS-CoV2 - USA              | ATGCTGATAATGGACCCCAAAATGACGAAATGCCCCGCATTACGTTTGGTGACCCTCAGATTCAA           | : 70  |
| SARS-CoV2 - Viet Nam         | ATGCTGATAATGGACCCCAAAATGACGAAATGCCCCGCATTACGTTTGGTGACCCTCAGATTCAA           | : 70  |
| SARS-CoV2 - Australia        | ATGCTGATAATGGACCCCAAAATGACGAAATGCCCCGCATTACGTTTGGTGACCCTCAGATTCAA           | : 70  |
| SARS-CoV2 - Taiwan           | ATGCTGATAATGGACCCCAAAATGACGAAATGCCCCGCATTACGTTTGGTGACCCTCAGATTCAA           | : 70  |
| SARS-CoV2 - Italy            | ATGCTGATAATGGACCCCAAAATGACGAAATGCCCCGCATTACGTTTGGTGACCCTCAGATTCAA           | : 70  |
| SARS-CoV2 - India            | ATGCTGATAATGGACCCCAAAATGACGAAATGCCCCGCATTACGTTTGGTGACCCTCAGATTCAA           | : 70  |
| SARS-CoV2 - Sweden           | ATGCTGATAATGGACCCCAAAATGACGAAATGCCCCGCATTACGTTTGGTGACCCTCAGATTCAA           | : 70  |
| SARS-CoV2 - Spain            | ATGCTGATAATGGACCCCAAAATGACGAAATGCCCCGCATTACGTTTGGTGACCCTCAGATTCAA           | : 70  |
| SARS-CoV2 - Brazil           | ATGCTGATAATGGACCCCAAAATGACGAAATGCCCCGCATTACGTTTGGTGACCCTCAGATTCAA           | : 70  |
| SARS-CoV2 - Pakistan         | ATGCTGATAATGGACCCCAAAATGACGAAATGCCCCGCATTACGTTTGGTGACCCTCAGATTCAA           | : 70  |
|                              | <b>TGCCAGTTGAATCTG</b>                                                      |       |
| SARS-CoV2 - China/Wuhan-Hu-1 | CTGGCAGTAACCAAGATGGAGAACGAGTGGGGGGGATCAAAAACAGCTCGGCCCAAGGTTTACCCAA         | : 140 |
| SARS-CoV2 - Japan            | CTGGCAGTAACCAAGATGGAGAACGAGTGGGGGGGATCAAAAACAGCTCGGCCCAAGGTTTACCCAA         | : 140 |
| SARS-CoV2 - South Korea      | CTGGCAGTAACCAAGATGGAGAACGAGTGGGGGGGATCAAAAACAGCTCGGCCCAAGGTTTACCCAA         | : 140 |
| SARS-CoV2 - Nepal            | CTGGCAGTAACCAAGATGGAGAACGAGTGGGGGGGATCAAAAACAGCTCGGCCCAAGGTTTACCCAA         | : 140 |
| SARS-CoV2 - USA              | CTGGCAGTAACCAAGATGGAGAACGAGTGGGGGGGATCAAAAACAGCTCGGCCCAAGGTTTACCCAA         | : 140 |
| SARS-CoV2 - Viet Nam         | CTGGCAGTAACCAAGATGGAGAACGAGTGGGGGGGATCAAAAACAGCTCGGCCCAAGGTTTACCCAA         | : 140 |
| SARS-CoV2 - Australia        | CTGGCAGTAACCAAGATGGAGAACGAGTGGGGGGGATCAAAAACAGCTCGGCCCAAGGTTTACCCAA         | : 140 |
| SARS-CoV2 - Taiwan           | CTGGCAGTAACCAAGATGGAGAACGAGTGGGGGGGATCAAAAACAGCTCGGCCCAAGGTTTACCCAA         | : 140 |
| SARS-CoV2 - Italy            | CTGGCAGTAACCAAGATGGAGAACGAGTGGGGGGGATCAAAAACAGCTCGGCCCAAGGTTTACCCAA         | : 140 |
| SARS-CoV2 - India            | CTGGCAGTAACCAAGATGGAGAACGAGTGGGGGGGATCAAAAACAGCTCGGCCCAAGGTTTACCCAA         | : 140 |
| SARS-CoV2 - Sweden           | CTGGCAGTAACCAAGATGGAGAACGAGTGGGGGGGATCAAAAACAGCTCGGCCCAAGGTTTACCCAA         | : 140 |
| SARS-CoV2 - Spain            | CTGGCAGTAACCAAGATGGAGAACGAGTGGGGGGGATCAAAAACAGCTCGGCCCAAGGTTTACCCAA         | : 140 |
| SARS-CoV2 - Brazil           | CTGGCAGTAACCAAGATGGAGAACGAGTGGGGGGGATCAAAAACAGCTCGGCCCAAGGTTTACCCAA         | : 140 |
| SARS-CoV2 - Pakistan         | CTGGCAGTAACCAAGATGGAGAACGAGTGGGGGGGATCAAAAACAGCTCGGCCCAAGGTTTACCCAA         | : 140 |
|                              | <b>TAATACTGGCTCTGGTTACCCGCTCTCACTCAACATGGCAAGGAAGACTTAAATCCCTCGAGGACAA</b>  |       |
| SARS-CoV2 - China/Wuhan-Hu-1 | TAATACTGGCTCTGGTTACCCGCTCTCACTCAACATGGCAAGGAAGACTTAAATCCCTCGAGGACAA         | : 210 |
| SARS-CoV2 - Japan            | TAATACTGGCTCTGGTTACCCGCTCTCACTCAACATGGCAAGGAAGACTTAAATCCCTCGAGGACAA         | : 210 |
| SARS-CoV2 - South Korea      | TAATACTGGCTCTGGTTACCCGCTCTCACTCAACATGGCAAGGAAGACTTAAATCCCTCGAGGACAA         | : 210 |
| SARS-CoV2 - USA              | TAATACTGGCTCTGGTTACCCGCTCTCACTCAACATGGCAAGGAAGACTTAAATCCCTCGAGGACAA         | : 210 |
| SARS-CoV2 - Viet Nam         | TAATACTGGCTCTGGTTACCCGCTCTCACTCAACATGGCAAGGAAGACTTAAATCCCTCGAGGACAA         | : 210 |
| SARS-CoV2 - Australia        | TAATACTGGCTCTGGTTACCCGCTCTCACTCAACATGGCAAGGAAGACTTAAATCCCTCGAGGACAA         | : 210 |
| SARS-CoV2 - Taiwan           | TAATACTGGCTCTGGTTACCCGCTCTCACTCAACATGGCAAGGAAGACTTAAATCCCTCGAGGACAA         | : 210 |
| SARS-CoV2 - Italy            | TAATACTGGCTCTGGTTACCCGCTCTCACTCAACATGGCAAGGAAGACTTAAATCCCTCGAGGACAA         | : 210 |
| SARS-CoV2 - India            | TAATACTGGCTCTGGTTACCCGCTCTCACTCAACATGGCAAGGAAGACTTAAATCCCTCGAGGACAA         | : 210 |
| SARS-CoV2 - Sweden           | TAATACTGGCTCTGGTTACCCGCTCTCACTCAACATGGCAAGGAAGACTTAAATCCCTCGAGGACAA         | : 210 |
| SARS-CoV2 - Spain            | TAATACTGGCTCTGGTTACCCGCTCTCACTCAACATGGCAAGGAAGACTTAAATCCCTCGAGGACAA         | : 210 |
| SARS-CoV2 - Brazil           | TAATACTGGCTCTGGTTACCCGCTCTCACTCAACATGGCAAGGAAGACTTAAATCCCTCGAGGACAA         | : 210 |
| SARS-CoV2 - Pakistan         | TAATACTGGCTCTGGTTACCCGCTCTCACTCAACATGGCAAGGAAGACTTAAATCCCTCGAGGACAA         | : 210 |
|                              | <b>GGCGTCCCAATTAACCAATAGCACTCCAGATGACCAAAATGGCTACTACCGAAGAGCTACCAAGCGAA</b> |       |
| SARS-CoV2 - China/Wuhan-Hu-1 | GGCGTCCCAATTAACCAATAGCACTCCAGATGACCAAAATGGCTACTACCGAAGAGCTACCAAGCGAA        | : 280 |
| SARS-CoV2 - Japan            | GGCGTCCCAATTAACCAATAGCACTCCAGATGACCAAAATGGCTACTACCGAAGAGCTACCAAGCGAA        | : 280 |
| SARS-CoV2 - South Korea      | GGCGTCCCAATTAACCAATAGCACTCCAGATGACCAAAATGGCTACTACCGAAGAGCTACCAAGCGAA        | : 280 |
| SARS-CoV2 - Nepal            | GGCGTCCCAATTAACCAATAGCACTCCAGATGACCAAAATGGCTACTACCGAAGAGCTACCAAGCGAA        | : 280 |
| SARS-CoV2 - USA              | GGCGTCCCAATTAACCAATAGCACTCCAGATGACCAAAATGGCTACTACCGAAGAGCTACCAAGCGAA        | : 280 |
| SARS-CoV2 - Viet Nam         | GGCGTCCCAATTAACCAATAGCACTCCAGATGACCAAAATGGCTACTACCGAAGAGCTACCAAGCGAA        | : 280 |
| SARS-CoV2 - Australia        | GGCGTCCCAATTAACCAATAGCACTCCAGATGACCAAAATGGCTACTACCGAAGAGCTACCAAGCGAA        | : 280 |
| SARS-CoV2 - Taiwan           | GGCGTCCCAATTAACCAATAGCACTCCAGATGACCAAAATGGCTACTACCGAAGAGCTACCAAGCGAA        | : 280 |
| SARS-CoV2 - Italy            | GGCGTCCCAATTAACCAATAGCACTCCAGATGACCAAAATGGCTACTACCGAAGAGCTACCAAGCGAA        | : 280 |
| SARS-CoV2 - India            | GGCGTCCCAATTAACCAATAGCACTCCAGATGACCAAAATGGCTACTACCGAAGAGCTACCAAGCGAA        | : 280 |
| SARS-CoV2 - Sweden           | GGCGTCCCAATTAACCAATAGCACTCCAGATGACCAAAATGGCTACTACCGAAGAGCTACCAAGCGAA        | : 280 |
| SARS-CoV2 - Spain            | GGCGTCCCAATTAACCAATAGCACTCCAGATGACCAAAATGGCTACTACCGAAGAGCTACCAAGCGAA        | : 280 |
| SARS-CoV2 - Brazil           | GGCGTCCCAATTAACCAATAGCACTCCAGATGACCAAAATGGCTACTACCGAAGAGCTACCAAGCGAA        | : 280 |
| SARS-CoV2 - Pakistan         | GGCGTCCCAATTAACCAATAGCACTCCAGATGACCAAAATGGCTACTACCGAAGAGCTACCAAGCGAA        | : 280 |
|                              | <b>TTCTGGTGGTACCGTAAATGAAAGATCTCAGTCCAGATGGTATTTCTACTACCTAGGAATGGGCC</b>    |       |
| SARS-CoV2 - China/Wuhan-Hu-1 | TTCTGGTGGTACCGTAAATGAAAGATCTCAGTCCAGATGGTATTTCTACTACCTAGGAATGGGCC           | : 350 |
| SARS-CoV2 - Japan            | TTCTGGTGGTACCGTAAATGAAAGATCTCAGTCCAGATGGTATTTCTACTACCTAGGAATGGGCC           | : 350 |
| SARS-CoV2 - South Korea      | TTCTGGTGGTACCGTAAATGAAAGATCTCAGTCCAGATGGTATTTCTACTACCTAGGAATGGGCC           | : 350 |
| SARS-CoV2 - Nepal            | TTCTGGTGGTACCGTAAATGAAAGATCTCAGTCCAGATGGTATTTCTACTACCTAGGAATGGGCC           | : 350 |
| SARS-CoV2 - USA              | TTCTGGTGGTACCGTAAATGAAAGATCTCAGTCCAGATGGTATTTCTACTACCTAGGAATGGGCC           | : 350 |
| SARS-CoV2 - Viet Nam         | TTCTGGTGGTACCGTAAATGAAAGATCTCAGTCCAGATGGTATTTCTACTACCTAGGAATGGGCC           | : 350 |
| SARS-CoV2 - Australia        | TTCTGGTGGTACCGTAAATGAAAGATCTCAGTCCAGATGGTATTTCTACTACCTAGGAATGGGCC           | : 350 |
| SARS-CoV2 - Taiwan           | TTCTGGTGGTACCGTAAATGAAAGATCTCAGTCCAGATGGTATTTCTACTACCTAGGAATGGGCC           | : 350 |
| SARS-CoV2 - Italy            | TTCTGGTGGTACCGTAAATGAAAGATCTCAGTCCAGATGGTATTTCTACTACCTAGGAATGGGCC           | : 350 |
| SARS-CoV2 - India            | TTCTGGTGGTACCGTAAATGAAAGATCTCAGTCCAGATGGTATTTCTACTACCTAGGAATGGGCC           | : 350 |
| SARS-CoV2 - Sweden           | TTCTGGTGGTACCGTAAATGAAAGATCTCAGTCCAGATGGTATTTCTACTACCTAGGAATGGGCC           | : 350 |
| SARS-CoV2 - Spain            | TTCTGGTGGTACCGTAAATGAAAGATCTCAGTCCAGATGGTATTTCTACTACCTAGGAATGGGCC           | : 350 |
| SARS-CoV2 - Brazil           | TTCTGGTGGTACCGTAAATGAAAGATCTCAGTCCAGATGGTATTTCTACTACCTAGGAATGGGCC           | : 350 |
| SARS-CoV2 - Pakistan         | TTCTGGTGGTACCGTAAATGAAAGATCTCAGTCCAGATGGTATTTCTACTACCTAGGAATGGGCC           | : 350 |
|                              | <b>AGGAGCTGGACTTCCTTATGGTCTAACAAAGA GGCATCATATGGTTGCACTGAGGAGSCTTGAAT</b>   |       |
| SARS-CoV2 - China/Wuhan-Hu-1 | AGGAGCTGGACTTCCTTATGGTCTAACAAAGA GGCATCATATGGTTGCACTGAGGAGSCTTGAAT          | : 420 |
| SARS-CoV2 - Japan            | AGGAGCTGGACTTCCTTATGGTCTAACAAAGA GGCATCATATGGTTGCACTGAGGAGSCTTGAAT          | : 420 |
| SARS-CoV2 - South Korea      | AGGAGCTGGACTTCCTTATGGTCTAACAAAGA GGCATCATATGGTTGCACTGAGGAGSCTTGAAT          | : 420 |
| SARS-CoV2 - Nepal            | AGGAGCTGGACTTCCTTATGGTCTAACAAAGA GGCATCATATGGTTGCACTGAGGAGSCTTGAAT          | : 420 |
| SARS-CoV2 - USA              | AGGAGCTGGACTTCCTTATGGTCTAACAAAGA GGCATCATATGGTTGCACTGAGGAGSCTTGAAT          | : 420 |
| SARS-CoV2 - Viet Nam         | AGGAGCTGGACTTCCTTATGGTCTAACAAAGA GGCATCATATGGTTGCACTGAGGAGSCTTGAAT          | : 420 |
| SARS-CoV2 - Australia        | AGGAGCTGGACTTCCTTATGGTCTAACAAAGA GGCATCATATGGTTGCACTGAGGAGSCTTGAAT          | : 420 |
| SARS-CoV2 - Taiwan           | AGGAGCTGGACTTCCTTATGGTCTAACAAAGA GGCATCATATGGTTGCACTGAGGAGSCTTGAAT          | : 420 |
| SARS-CoV2 - Italy            | AGGAGCTGGACTTCCTTATGGTCTAACAAAGA GGCATCATATGGTTGCACTGAGGAGSCTTGAAT          | : 420 |
| SARS-CoV2 - India            | AGGAGCTGGACTTCCTTATGGTCTAACAAAGA GGCATCATATGGTTGCACTGAGGAGSCTTGAAT          | : 420 |
| SARS-CoV2 - Sweden           | AGGAGCTGGACTTCCTTATGGTCTAACAAAGA GGCATCATATGGTTGCACTGAGGAGSCTTGAAT          | : 420 |
| SARS-CoV2 - Spain            | AGGAGCTGGACTTCCTTATGGTCTAACAAAGA GGCATCATATGGTTGCACTGAGGAGSCTTGAAT          | : 420 |
| SARS-CoV2 - Brazil           | AGGAGCTGGACTTCCTTATGGTCTAACAAAGA GGCATCATATGGTTGCACTGAGGAGSCTTGAAT          | : 420 |
| SARS-CoV2 - Pakistan         | AGGAGCTGGACTTCCTTATGGTCTAACAAAGA GGCATCATATGGTTGCACTGAGGAGSCTTGAAT          | : 420 |
|                              | <b>ACACCAAAA AYCACATTGGCACCCGCAATCTGT TGTAGCACGATTGCAGCATTG</b>             |       |
| SARS-CoV2 - China/Wuhan-Hu-1 | ACACCAAAAGATCACATGGCACCCGCAATCTGTAAACAATGCTGCAATGTGTGCAACTTCTCTCAG          | : 490 |
| SARS-CoV2 - Japan            | ACACCAAAAGATCACATGGCACCCGCAATCTGTAAACAATGCTGCAATGTGTGCAACTTCTCTCAG          | : 490 |
| SARS-CoV2 - South Korea      | ACACCAAAAGATCACATGGCACCCGCAATCTGTAAACAATGCTGCAATGTGTGCAACTTCTCTCAG          | : 490 |
| SARS-CoV2 - Nepal            | ACACCAAAAGATCACATGGCACCCGCAATCTGTAAACAATGCTGCAATGTGTGCAACTTCTCTCAG          | : 490 |
| SARS-CoV2 - USA              | ACACCAAAAGATCACATGGCACCCGCAATCTGTAAACAATGCTGCAATGTGTGCAACTTCTCTCAG          | : 490 |
| SARS-CoV2 - Viet Nam         | ACACCAAAAGATCACATGGCACCCGCAATCTGTAAACAATGCTGCAATGTGTGCAACTTCTCTCAG          | : 490 |
| SARS-CoV2 - Australia        | ACACCAAAAGATCACATGGCACCCGCAATCTGTAAACAATGCTGCAATGTGTGCAACTTCTCTCAG          | : 490 |
| SARS-CoV2 - Taiwan           | ACACCAAAAGATCACATGGCACCCGCAATCTGTAAACAATGCTGCAATGTGTGCAACTTCTCTCAG          | : 490 |
| SARS-CoV2 - Italy            | ACACCAAAAGATCACATGGCACCCGCAATCTGTAAACAATGCTGCAATGTGTGCAACTTCTCTCAG          | : 490 |
| SARS-CoV2 - India            | ACACCAAAAGATCACATGGCACCCGCAATCTGTAAACAATGCTGCAATGTGTGCAACTTCTCTCAG          | : 490 |
| SARS-CoV2 - Sweden           | ACACCAAAAGATCACATGGCACCCGCAATCTGTAAACAATGCTGCAATGTGTGCAACTTCTCTCAG          | : 490 |
| SARS-CoV2 - Spain            | ACACCAAAAGATCACATGGCACCCGCAATCTGTAAACAATGCTGCAATGTGTGCAACTTCTCTCAG          | : 490 |
| SARS-CoV2 - Brazil           | ACACCAAAAGATCACATGGCACCCGCAATCTGTAAACAATGCTGCAATGTGTGCAACTTCTCTCAG          | : 490 |
| SARS-CoV2 - Pakistan         | ACACCAAAAGATCACATGGCACCCGCAATCTGTAAACAATGCTGCAATGTGTGCAACTTCTCTCAG          | : 490 |
